1 **Nanopore direct RNA sequencing maps an Arabidopsis N6 methyladenosine**

2 **epitranscriptome**

3

4

5 Matthew T. Parker<sup>1†</sup>, Katarzyna Knop<sup>1†</sup>, Anna V. Sherwood<sup>1†</sup>, Nicholas J. Schurch<sup>1†‡</sup>, Katarzyna

6 Mackinnon<sup>1</sup>, Peter D. Gould<sup>2</sup>, Anthony Hall<sup>3</sup>, Geoffrey J. Barton<sup>1\*</sup> and Gordon G. Simpson<sup>1,4\*</sup>

7

8 <sup>1</sup>School of Life Sciences, University of Dundee, Dow Street, Dundee DD1 5EH, UK

9 <sup>2</sup>Institute of Integrative Biology, University of Liverpool, Crown Street, Liverpool, L69 7ZB, UK

10 <sup>3</sup>Earlham Institute, Norwich Research Park, Norwich, NR4 7UZ, UK

11 <sup>4</sup>James Hutton Institute, Invergowrie, DD2 5DA, UK

12

13 <sup>†</sup>Contributed equally

14

15 \*Correspondence: [g.g.simpson@dundee.ac.uk](mailto:g.g.simpson@dundee.ac.uk) ; [g.j.barton@dundee.ac.uk](mailto:g.j.barton@dundee.ac.uk)

16

17

18 Current Address:

19 <sup>‡</sup>Biomathematics and Statistics Scotland, The James Hutton Institute, Aberdeen, AB15 8QH, UK

20

## 21 **Abstract**

22 Understanding genome organization and gene regulation requires insight into RNA transcription,  
23 processing and modification. We adapted nanopore direct RNA sequencing to examine RNA from a  
24 wild-type accession of the model plant *Arabidopsis thaliana* and a mutant defective in mRNA  
25 methylation (m<sup>6</sup>A). Here we show that m<sup>6</sup>A can be mapped in full-length mRNAs transcriptome-wide  
26 and reveal the combinatorial diversity of cap-associated transcription start sites, splicing events,  
27 poly(A) site choice and poly(A) tail length. Loss of m<sup>6</sup>A from 3' untranslated regions is associated  
28 with decreased relative transcript abundance and defective RNA 3' end formation. A functional  
29 consequence of disrupted m<sup>6</sup>A is a lengthening of the circadian period. We conclude that nanopore  
30 direct RNA sequencing can reveal the complexity of mRNA processing and modification in full-length  
31 single molecule reads. These findings can refine Arabidopsis genome annotation. Further, applying  
32 this approach to less well-studied species could transform our understanding of what their genomes  
33 encode.

34

## 35 **Introduction**

36 Patterns of pre-mRNA processing and base modifications determine eukaryotic mRNA coding  
37 potential and fate. Alternative transcripts produced from the same gene can differ in the position of  
38 the start site, the site of cleavage and polyadenylation, and the combination of exons spliced into  
39 the mature mRNA. Collectively termed the epitranscriptome, RNA modifications play crucial context-  
40 specific roles in gene expression<sup>1,2</sup>. The most abundant internal modification of mRNA is methylation  
41 of adenosine at the N6 position (m<sup>6</sup>A). Knowledge of RNA modifications and processing  
42 combinations is essential to understand gene expression and what genomes really encode.  
43 RNA sequencing (RNAseq) is used to dissect transcriptome complexity: it involves copying RNA into  
44 complementary DNA (cDNA) with reverse transcriptases (RTs) and then sequencing the subsequent  
45 DNA copies. RNAseq reveals diverse features of transcriptomes, but limitations can include

46 misidentification of 3' ends through internal priming<sup>3</sup>, spurious antisense and splicing events  
47 produced by RT template switching<sup>4,5</sup>, and the inability to detect all base modifications in the  
48 copying process<sup>6</sup>. The fragmentation of RNA prior to short-read sequencing makes it difficult to  
49 interpret the combination of authentic RNA processing events and remains an unsolved problem<sup>7</sup>.

50 We investigated whether long-read direct RNA sequencing (DRS) with nanopores<sup>8</sup> could  
51 reveal the complexity of Arabidopsis mRNA processing and modifications. In nanopore DRS, the  
52 protein pore (nanopore) sits in a membrane through which an electrical current is passed, and intact  
53 RNA is fed through the nanopore by a motor protein<sup>8</sup>. Each RNA sequence within the nanopore  
54 (5 bases) can be identified by the magnitude of signal it produces. Arabidopsis is a pathfinder model  
55 in plant biology, and its genome annotation strongly influences the annotation and our  
56 understanding of what other plant genomes encode. We applied nanopore DRS and Illumina RNAseq  
57 to wild-type Arabidopsis (Col-0) and mutants defective in m<sup>6</sup>A<sup>9</sup> and exosome-mediated RNA decay<sup>10</sup>.  
58 We reveal m<sup>6</sup>A and combinations of RNA processing events (alternative patterns of 5' capped  
59 transcription start sites, splicing, 3' polyadenylation and poly(A) tail length) in full-length Arabidopsis  
60 mRNAs transcriptome-wide.

61

## 62 **Results**

### 63 *Nanopore DRS detects long, complex mRNAs and short, structured non-coding RNAs*

64 We purified poly (A)+ RNA from four biological replicates of 14-day-old Arabidopsis Col-0 seedlings.  
65 We incorporated synthetic External RNA Controls Consortium (ERCC) RNA Spike-In mixes into all  
66 replicates<sup>11,12</sup> and carried out nanopore DRS. Illumina RNAseq was performed in parallel on similar  
67 material. Using Guppy base-calling (Oxford Nanopore Technologies) and minimap2 alignment  
68 software<sup>13</sup>, we identified around 1 million reads per sample (Supplementary table 1). The longest  
69 read alignments were 12.7 kb for mRNA transcribed from AT1G48090, spanning 63 exons,  
70 (Figure 1A), and 12.8 kb for mRNA transcribed from At1G67120, spanning 58 exons (Supplementary

71 figure 1A). These represent some of the longest contiguous mRNAs sequenced from Arabidopsis.

72 Among the shortest read alignments were those spanning genes encoding highly structured non-

73 coding RNAs such as UsnRNAs and snoRNAs such as U3 (Figure 1B).

74

75 *Base-calling errors in nanopore DRS are non-random*

76 We used ERCC RNA Spike-Ins<sup>11</sup> as internal controls to monitor the properties of the sequencing

77 reads. The spike-ins were detected in a quantitative manner (Supplementary figure 1B), consistent

78 with the suggestion that nanopore sequencing is quantitative<sup>8</sup>. For the portion of reads that align to

79 the reference, sequence identity was 92% when measured against the ERCC RNA spike-ins

80 (Supplementary figure 1C). The errors showed evidence of base specificity (Supplementary

81 figure 1D, E). For example, guanine was under-represented and uracil over-represented in indels and

82 substitutions relative to the reference nucleotide (nt) distribution. In some situations, this bias could

83 impact the utility of interpreting nanopore sequence errors. We used the proovread software tool<sup>14</sup>

84 and parallel Illumina RNAseq data to correct base-calling errors in the nanopore reads<sup>15</sup>.

85

86 *Artefactual splitting of raw signal affects transcript interpretation*

87 We detected artefacts caused by the MinKNOW software splitting raw signal from single molecules

88 into two or more reads. As a result, alignments comprising apparently novel 3' ends were mapped as

89 adjacent to alignments with apparently novel 5' ends (Supplementary figure 1F). A related

90 phenomenon called over-splitting was recently reported in nanopore DNA sequencing<sup>16</sup>. Over-

91 splitting can be detected when two reads sequenced consecutively through the same pore are

92 mapped to adjacent loci in the genome<sup>16</sup>. Over-splitting in nanopore DRS generally occurs at low

93 frequency (< 2% of reads). However, RNAs originating from specific gene loci, such as *RH3*

94 (*AT5G26742*), appear to be more susceptible, with up to 20% of reads affected across multiple

95 sequencing experiments (Supplementary figure 1F).

96

97 *Spurious antisense reads are rare or absent in nanopore DRS*

98 Since only two out of 9,445 (0.02%) reads mapped antisense to the ERCC RNA Spike-In collection<sup>11</sup>  
99 and 0 of 19,665 reads mapped antisense to the highly expressed gene *RUBISCO ACTIVASE (RCA)*  
100 (*AT2G39730*), we conclude that spurious antisense is rare or absent from nanopore DRS data. This  
101 simplifies the interpretation of authentic antisense RNAs, which is important in Arabidopsis because  
102 the distinction between RT-dependent template switching and authentic antisense RNAs produced  
103 by RNA-dependent RNA polymerases that copy mRNA is not straightforward<sup>17</sup>. For example, by  
104 nanopore DRS, we could identify Arabidopsis long non-coding antisense RNAs, such as those at the  
105 auxin efflux carriers *PIN4* and *PIN7* (Figure 1C, Supplementary figure 1G). The existence of these  
106 previously unannotated antisense RNAs was supported by Illumina RNAseq of wild-type Col-0 and  
107 the exosome mutant *hen2-2* (Figure 1C, Supplementary figure 1G), the latter of which had a 13-fold  
108 increase in abundance of these antisense RNAs. Consequently, the low level of steady-state  
109 accumulation of some antisense RNAs may explain why they are currently unannotated.

110

111 *Nanopore DRS confirms sites of RNA 3' end formation and estimates poly(A) tail length*

112 Ligation of the motor protein adapter to RNA 3' ends results in nanopores sequencing mRNA poly(A)  
113 tails first. We used the nanopolish-polyA software tool to estimate poly(A) tail lengths for individual  
114 transcripts<sup>18</sup>. This approach indicated an average length of 76 nt for Arabidopsis mRNA poly(A) tails,  
115 but with a wide range in estimated lengths for individual mRNAs (95% were in the 13–197 nt range;  
116 Figure 2A). The generally shorter poly(A) tails of chloroplast- and mitochondria-encoded transcripts,  
117 which are a feature of RNA decay in these organelles, were also detectable. We found that poly(A)  
118 tail length correlates negatively with gene expression in Arabidopsis (Spearman's  $\rho = -0.3$ ,  $p = 2 \times 10^{-133}$ ,  
119 95% CIs [-0.32, -0.28]; Supplementary figure 2A), consistent with other species analysed by short-  
120 read TAILseq<sup>19</sup>.

121 We previously mapped Arabidopsis mRNA 3' ends transcriptome-wide using Helicos  
122 sequencing<sup>20</sup>. We compared the position of 3' ends of nanopore DRS read alignments and Helicos  
123 data genome-wide. The median genomic distance between nanopore DRS and Helicos 3' ends was 0  
124  $\pm$  13 nt (one standard deviation) demonstrating close agreement between these orthogonal  
125 technologies (Figure 2B). Likewise, the overall distribution of the 3' ends of aligned nanopore DRS  
126 reads resembles the pattern we previously reported with Helicos data<sup>20</sup>. For example, 97% of  
127 nanopore DRS 3' ends (4,152,800 reads at 639,178 unique sites, 93% of all unique sites) mapped to  
128 either annotated 3' untranslated regions (UTRs) or downstream of the current annotation. Mapping  
129 of 3' ends to coding sequences or 5'UTRs was rare (2.8%, 119,524 reads at 39,610 unique sites, 5.8%  
130 of all unique sites), and mapping to introns even rarer (0.29%, 12,554 reads at 7,791 unique sites,  
131 1.1% of unique sites). Even so, examples of the latter included sites of alternative polyadenylation  
132 with well-established regulatory roles, such as in mRNA encoding the RNA-binding protein FPA,  
133 which controls flowering time<sup>21</sup> (Figure 2C), and in mRNA encoding the histone H3K9 demethylase  
134 IBM1, which controls levels of genic DNA methylation<sup>22</sup> (Supplementary figure 2B).

135 Since RT-dependent internal priming can result in the misinterpretation of authentic  
136 cleavage and polyadenylation sites<sup>3</sup>, we next determined whether nanopore DRS was compromised  
137 in this way. To address this issue, we examined whether the 3' ends of nanopore DRS reads mapped  
138 to potential internal priming substrates comprised of six consecutive adenosines within a  
139 transcribed coding sequence (according to the Arabidopsis Information Portal Col-0 genome  
140 annotation, Araport11 ). Of the 10,116 such oligo (A)<sub>6</sub> sequences, only four have read alignments  
141 terminating within 13 nt in all four datasets. Of these, two were not detectable after error correction  
142 with proovread (suggesting that they resulted from alignment errors) and the other two mapped to  
143 the terminal exon of coding sequence annotation, indicating that they may be authentic 3' ends.  
144 Hence, internal priming is rare or absent in nanopore DRS data. Overall, we conclude that nanopore  
145 DRS can identify multiple authentic features of RNA 3' end processing.

146

147 *Cap-dependent 5' RNA detection by nanopore DRS*

148 Nanopore DRS reads are frequently truncated prior to annotated transcription start sites, resulting  
149 in a 3' bias of genomic alignments (Figure 3A)<sup>15</sup>. Consequently, it is impossible to determine which, if  
150 any, aligned reads correspond to full-length transcripts. To address this issue, we used cap-  
151 dependent ligation of a biotinylated 5' adapter RNA to purify capped mRNAs. We then re-sequenced  
152 two biological replicates of Arabidopsis Col-0 incorporating 5' adapter ligation (Supplementary  
153 table 1) and filtered the reads for 5' adapter RNA sequences using the sequence alignment tool  
154 BLASTN and specific criteria (Supplementary table 2). We then used high confidence examples of  
155 sequences that passed or failed these criteria to train a convolutional neural network to detect the  
156 5' adapter RNA in the raw signal (Supplementary figure 3A–C). Hence, we improved 5' adapter-  
157 ligated RNA detection without requiring base-calling or genome alignment, and demonstrated  
158 enrichment of full-length, cap-dependent mRNA sequences (Figure 3A, B). This procedure reduced  
159 the median 3' bias of nanopore read alignments per gene (as measured by quartile coefficient of  
160 variation of per base coverage) from 0.45 (95% CIs [0.43,0.47]) to 0.08 (95% CIs [0.07,0.09];  
161 Figure 3B).

162 In order to determine whether the 5' ends we detected reflect full-length mRNAs, we  
163 compared them against annotated transcription start sites in datasets derived from full-length  
164 Arabidopsis cDNA clones<sup>23</sup>. We found that 41% of adapter-ligated nanopore DRS reads mapped  
165 within 5 nt of transcription start sites and 60% mapped within 13 nt (Figure 3C). We also detected  
166 recently defined examples of alternative 5' transcription start sites<sup>24</sup> at specific Arabidopsis genes  
167 (Supplementary figure 3D). We therefore conclude that this approach is effective in detecting  
168 authentic mRNA 5' ends.

169 Reads with adapters had, on average, 11 nt more at their 5' ends that could be aligned to  
170 the genome compared with the most common 5' alignment position of reads lacking the 5' adapter

171 RNA (Figure 3D). This difference may be explained by loss of processive control by the motor protein  
172 when the end of an RNA molecule enters the pore. As a result, the 5' end of RNA is not correctly  
173 sequenced. Consistent with these Arabidopsis transcriptome-wide nanopore DRS data, reads  
174 mapping to the synthetic ERCC RNA Spike-Ins and *in vitro* transcribed RNAs also lacked ~11 nt of  
175 authentic 5' sequence (Supplementary figure 3E, F). However, the precise length of 5' sequence  
176 missing from all of these RNAs varied, suggesting that sequence- or context-specific effects on  
177 sequence accuracy are associated with the passage of 5' RNA through the pore (Figure 3D,  
178 Supplementary figure 3E, F).

179         Despite the close agreement between nanopore DRS, Illumina RNAseq and full-length cDNA  
180 data<sup>23</sup> at RCA, the start site annotated in Araport11 and the *Arabidopsis thaliana* Reference  
181 Transcript Dataset 2 (AtRTD2)<sup>25</sup> is quite different (Figure 3E). The apparent overestimation of 5'UTR  
182 length is widespread in Araport11 annotation (Supplementary figure 3G), consistent with the  
183 assessment of capped Arabidopsis 5' ends detected by nanoPARE sequencing<sup>26</sup>. Consequently, with  
184 appropriate modification to the current protocol, such as we describe here, nanopore DRS data can  
185 be used to revise Arabidopsis transcription start site annotations.

186

### 187 *Nanopore DRS reveals the complexity of splicing events*

188 In single reads, nanopore sequencing revealed some of the most complex splicing combinations so  
189 far identified in the Arabidopsis transcriptome. For example, the splicing pattern of a 12.7 kb read  
190 alignment, comprised of 63 exons, agreed exactly with the *AT1G48090.4* isoform annotated in  
191 Araport11 (Figure 1A). Mutually exclusive alternative splicing of *FLM* (*AT1G77080*) exons that  
192 mediate the thermosensitive response controlling flowering time<sup>27</sup> was also detected (Figure 4A).  
193 However, a combination of base-calling and alignment errors contributed to the misidentification of  
194 splicing events for uncorrected DRS data: 58% (170,702) of the unique splice junctions detected in  
195 the combined set of replicate data were absent from Araport11 and AtRTD2 annotations and were



196 unsupported by Illumina RNAseq (Figure 4B, Supplementary table 3). We applied proovread<sup>14,15</sup>  
197 error correction with the parallel Illumina RNAseq data and then re-analysed the corrected and  
198 uncorrected nanopore DRS data. After error correction, only 13% (39,061) of unique splice junctions  
199 were unsupported by an orthogonal dataset, consistent with an improvement in alignment accuracy.  
200 The four nanopore DRS datasets for Col-0 biological replicates captured 75% (102,486) and 69%  
201 104,686) of Araport11 and AtRTD2 splice site annotations, respectively. Most of the canonical  
202 GU/AG splicing events (100,450; 81%) detected in the error-corrected nanopore data were found in  
203 both annotations and were supported by Illumina RNAseq (Figure 4B, Supplementary table 3). A  
204 total of 3,234 unique canonical splicing events in the error-corrected nanopore DRS data were  
205 supported by Illumina RNAseq but absent from both Araport11 and AtRTD2 annotations,  
206 highlighting potential gaps in our understanding of the complexity of Arabidopsis splicing annotation  
207 (Figure 4B, Supplementary table 3). Consistent with this, we validated three of these splicing events  
208 using RT-PCR (Polymerase Chain Reaction) followed by cloning and sequencing (Supplementary  
209 figure 4A). In order to examine the features of these unannotated splices, we applied previously  
210 determined splice site position weight matrices of the flanking sequences to categorize U2 or U12  
211 class splice sites<sup>28</sup>. Of the 3,234 novel GU/AG events found in error-corrected data and supported by  
212 Illumina alignments, 74% were classified as canonical U2 or U12 splice sites, suggesting that they are  
213 authentic (Supplementary figure 4B).

214 In addition to previously unannotated splicing events, we identified unannotated  
215 combinations of previously established splice sites. For example, we identified 19 *FLM* splicing  
216 patterns that adhered to known splice junction sites (Figure 4A). However, 11 of these transcript  
217 isoforms were not previously annotated. In order to investigate this phenomenon transcriptome-  
218 wide, we analysed the 5' cap-dependent nanopore DRS datasets of full-length mRNAs  
219 (Supplementary table 1). Unique sets of co-splicing events were extracted from error-corrected  
220 reads (so as to focus on splicing, we did not consider single exon reads or 5' and 3' positions). In

221 total, 13,064 unique splicing patterns were detected that matched annotations in Araport11,  
222 AtRTD2 or both (Figure 4C). Another 8,659 unique splicing patterns were identified that were not  
223 present in either annotation (Figure 4C, Supplementary table 3). Of these, 50% (4,293) used only  
224 splice donor and acceptor pairs that were already annotated in either Araport11 or AtRTD2. Hence,  
225 this approach defines splicing patterns (including retained introns) produced from alternative  
226 combinations of known splice sites.

227 Overall, we conclude that nanopore DRS can reveal a greater complexity of splicing in the  
228 context of full-length mRNAs compared with short-read data. However, accurate splice pattern  
229 detection benefits from error correction with, for example, high-accuracy orthogonal short-read  
230 sequencing data. However, even with error-free sequences, accurate splice detection can be  
231 confounded by the existence of equivalent alternative junctions<sup>29</sup>. Therefore, improved  
232 computational tools are required, not only for error correction but also for splicing-aware long-read  
233 alignment.

234

### 235 *Differential error site analysis reveals the m<sup>6</sup>A epitranscriptome*

236 The epitranscriptome has emerged recently as a crucial, but relatively neglected, layer of gene  
237 regulation<sup>1,2</sup>. m<sup>6</sup>A has been mapped transcriptome-wide using approaches based on antibodies that  
238 recognize this mark<sup>6,30</sup>. However, in principle, m<sup>6</sup>A can be detected by nanopore DRS<sup>8</sup>. Since m<sup>6</sup>A is  
239 not included in the training data for nanopore base-calling software, we asked whether its incorrect  
240 interpretation could be used to identify Arabidopsis m<sup>6</sup>A transcriptome-wide. For this, we applied  
241 nanopore DRS to four biological replicates of an Arabidopsis mutant defective in the function of  
242 Virilizer (*vir-1*), a conserved m<sup>6</sup>A writer complex component, and four biological replicates of a line  
243 expressing VIR fused to Green Fluorescent Protein (GFP) that restores VIR activity in the *vir-1* mutant  
244 background<sup>9</sup> (Supplementary figure 5A). In parallel, we sequenced a set of six biological replicates  
245 with Illumina RNAseq. We then used a G-test statistical analysis to determine whether there was a

246 differential error profile in alignments at each reference base between the mutant (defective m<sup>6</sup>A)  
247 and VIR-complemented lines. We identified 17,491 sites with a more than two-fold higher error rate  
248 (compared with the TAIR10 reference base) in the VIR-complemented line with restored m<sup>6</sup>A  
249 (Figure 5A). No VIR-dependent error sites mapped to either chloroplast or mitochondrial-encoded  
250 RNAs. In all, 99.8% of the differential error sites mapped within Araport11 annotated protein-coding  
251 genes. Motif analysis of these error sites revealed the DRAYH sequence (D=G or U or A, R=G or A,  
252 Y=C or U, H=A or C or U; Figure 5B, E value=3.3×10<sup>-191</sup>), which closely resembles the established m<sup>6</sup>A  
253 target consensus<sup>1,2</sup>. In addition, like the established location of m<sup>6</sup>A sites in mRNAs<sup>1,2</sup>, the error sites  
254 were preferentially found in 3'UTRs (Figure 5C). Since approximately 5 nt contribute to the observed  
255 current at a given time point in nanopore sequencing<sup>8</sup>, the presence of a methylated adenosine  
256 could affect the accuracy of base-calling for the surrounding nucleotides. Consistent with this, we  
257 identified 4,749 sequences matching the motif discovered at error sites (False Discovery Rate [FDR] <  
258 0.1; Supplementary figure 5B), with a median of two error sites per motif (95% CIs [1, 7]). Overall,  
259 these results agree with the established and conserved properties of authentic m<sup>6</sup>A sites<sup>1,2</sup>,  
260 suggesting that differential error sites can be used to identify thousands of m<sup>6</sup>A modifications in  
261 nanopore DRS datasets.

262 In order to examine the validity of m<sup>6</sup>A sites identified by the differential error site analysis,  
263 we used an orthogonal technique to map m<sup>6</sup>A. Previous maps of Arabidopsis m<sup>6</sup>A are based on Me-  
264 RIP<sup>31,32</sup> and limited by a resolution of around 200 nt<sup>33</sup>. Therefore, to examine Arabidopsis m<sup>6</sup>A sites  
265 with a more accurate method, we used miCLIP<sup>30</sup> analysis of three biological replicates of Arabidopsis  
266 Col-0. We found that, like the differential error sites uncovered in the nanopore DRS analysis, the  
267 Arabidopsis miCLIP reads were enriched in 3' UTRs but with no enrichment over stop codons  
268 (Figure 5D, Supplementary figure 5C). In all, 77% of the called nanopore DRS differential error sites  
269 fell within 5 nt of an miCLIP peak (Figure 5E, F). We therefore conclude that our analysis of nanopore  
270 data can detect authentic VIR-dependent m<sup>6</sup>A sites transcriptome-wide.

271

272 *Defective m<sup>6</sup>A perturbs gene expression patterns and lengthens the circadian period*

273 The combination of transcript processing and modification data obtained using nanopore DRS  
274 enabled us to investigate the impact of m<sup>6</sup>A on Arabidopsis gene expression. We found a global  
275 reduction in protein-coding gene expression in *vir-1* (using either nanopore DRS or Illumina RNAseq  
276 data), corresponding to transcripts that were methylated in the VIR-complemented line (Figure 6A,  
277 Supplementary Figure 6A). These findings are consistent with the recent discovery that m<sup>6</sup>A  
278 predominantly protects Arabidopsis mRNAs from endonucleolytic cleavage<sup>32</sup>. Therefore, although  
279 the m<sup>6</sup>A writer complex comprises conserved components that target a conserved consensus  
280 sequence and distribution of m<sup>6</sup>A is enriched in the last exon, it appears that this modification  
281 predominantly promotes mRNA decay in human cells<sup>34</sup>, but mRNA stability in Arabidopsis<sup>32</sup>.

282 The changes in gene expression in *vir-1* were wide ranging (Supplementary figure 6B–D). For  
283 example, we found that the abundance of mRNAs encoding components of the interlocking  
284 transcriptional feedback loops that comprise the Arabidopsis circadian oscillator<sup>35</sup>, such as *CCA1*,  
285 were altered in *vir-1* (Supplementary figure 6B, C). This distinction was associated with a biological  
286 consequence in that the *vir-1* mutant had a lengthened clock period (Figure 6B, C). We detected m<sup>6</sup>A  
287 at mRNAs encoding the clock components *CCA1*, *PRR7*, *GI* and *LNK1/2* in both the nanopore DRS and  
288 miCLIP data (Supplementary figure 6B). We also detected shifts in the poly(A) tail length  
289 distributions of mRNAs transcribed from genes previously shown to be under circadian control. At  
290 *CAB1* mRNAs, for example, we detected poly(A) tail lengths that peaked at approximately 20, 40 and  
291 60 nt (Figure 6D). *vir-1* mutants had reduced abundance of *CAB1* mRNAs with 20 and 40 nt poly(A)  
292 tails, and an increased abundance of poly(A) tails of 60 nt in length (Figure 6D). Therefore, nanopore  
293 DRS may uncover the circadian control of poly(A) tail length, as previously reported for specific  
294 Arabidopsis genes<sup>36</sup>. An output of the circadian clock is the control of flowering time, and we found  
295 that not only were photoperiod pathway components differentially expressed but so too were other

296 flowering time genes (Supplementary table 4). Notably, *FLOWERING LOCUS C (FLC)* expression was  
297 reduced by more than 40-fold compared with the wild type (Supplementary figure 6D).

298 Consequently, the proper control of circadian rhythms, flowering time and the regulatory module at  
299 *FLC* ultimately requires the m<sup>6</sup>A writer complex component, VIR.

300

301 *Defective m<sup>6</sup>A is associated with disrupted RNA 3' end formation*

302 In addition to measuring RNA expression, we examined the impact of m<sup>6</sup>A loss on pre-mRNA  
303 processing. Detectable disruptions to splicing in *vir-1* were modest. For example, using the DEX-Seq  
304 software tool<sup>37</sup> for analysis of annotated splice sites, we found only weak effect-size changes to  
305 cassette exons, retained introns or alternative donor/acceptor sites compared with the VIR-  
306 complemented line in our Illumina data (Supplementary figure 6E). In contrast, a clear defect in RNA  
307 3' end formation in *vir-1* was apparent. Using a Kolmogorov–Smirnov test, we identified 3,579 genes  
308 with an altered nanopore DRS 3' position profile in the *vir-1* mutant compared with the VIR-  
309 complemented line (FDR < 0.05, absolute change in position of >13 nt; Figure 6E). Of these, 3,008  
310 displayed a shift to usage of more proximal poly(A) sites in *vir-1*: 60% of these genes also contain  
311 m<sup>6</sup>A sites detectable by nanopore DRS (compared with 32% of all expressed genes,  $p=1.1\times 10^{-266}$ ;  
312 70% were detectable by miCLIP compared with 43% of all expressed genes,  $p=3.5\times 10^{-237}$ ) and  
313 correspond to locations of increased cleavage downstream of m<sup>6</sup>A sites in the *vir-1* mutant  
314 (Supplementary figure 6F). A total of 571 genes showed increased transcriptional readthrough  
315 beyond the 3' end in *vir-1* (Figure 6E): 73% of these loci also contained nanopore-mapped m<sup>6</sup>A sites  
316 ( $p=1.2\times 10^{-90}$ ; 78% were detectable by miCLIP,  $p=2.1\times 10^{-66}$ ). The impacts of altered 3' processing can  
317 be complex and have the potential to change the relative abundance of transcripts processed from  
318 the same gene but with different coding potential. For example, we detected increased readthrough  
319 of an intronic cleavage site in the Symplekin-like gene *TANG1 (AT1G27595)*; Supplementary  
320 figure 6G) and increased readthrough and cryptic splicing at *ALG3 (AT2G47760)* that also results in

321 chimeric RNA formation with the downstream gene *GH3.9* (*AT2G4G7750*; Figure 6F). The existence  
322 of the *ALG3-GH3.9* chimeric RNAs was supported by Illumina RNAseq (Figure 6F) and confirmed by  
323 RT-PCR, cloning and sequencing (Supplementary figure 6H). We detected 523 loci with increased  
324 levels of chimeric RNAs in *vir-1* resulting from unterminated transcription proceeding into  
325 downstream genes on the same strand. Chimeric RNAs were recently detected in mutants affecting  
326 other components of the Arabidopsis m<sup>6</sup>A writer complex, MTA and FIP37<sup>38</sup>. However, only 33% of  
327 upstream genes forming the chimeric RNAs had detectable m<sup>6</sup>A sites in the VIR-complemented line  
328 with restored VIR activity. Consequently, these findings might be explained either by an m<sup>6</sup>A-  
329 independent role for VIR (or the writer complex) in 3' end formation or an indirect effect on factors  
330 required for 3' processing. m<sup>6</sup>A independent roles for the human m<sup>6</sup>A methyltransferases METTL3<sup>39</sup>  
331 and METTL16<sup>40</sup> have been found previously, and a role for the writer complex in controlling  
332 Arabidopsis RNA processing independent of m<sup>6</sup>A cannot be overlooked<sup>40</sup>. In mammals, recognition  
333 of the canonical poly(A) signal AAUAAA involves direct binding by CPSF30<sup>41,42</sup>. Notably, alternative  
334 polyadenylation controls the expression of an Arabidopsis CPSF30 isoform that encodes a YT521-B  
335 homology (YTH) domain with the potential to bind and read m<sup>6</sup>A<sup>43</sup>. A recent study indicated that this  
336 YTH domain-containing isoform is required to suppress chimera formation<sup>38</sup>. Consequently, in plants,  
337 m<sup>6</sup>A may also contribute to the recognition of specific RNA 3' ends.

338

### 339 **Concluding remarks**

340 We have shown that nanopore DRS has the potential to refine multiple features of Arabidopsis  
341 genome annotation and to generate the clearest map to date of m<sup>6</sup>A locations, despite the genome  
342 sequence being available since 2000<sup>44</sup>. Modern agriculture is dominated by a handful of intensely  
343 researched crops<sup>45</sup>, but to diversify global food supply, enhance agricultural productivity and tackle  
344 malnutrition there is a need to focus on crops utilized in rural societies that have received little  
345 attention for crop improvement<sup>46</sup>. Based on our experience with Arabidopsis, we anticipate that the

346 combination of nanopore DRS and other sequencing approaches will improve genome annotation.  
347 Consistent with this, we recently applied nanopore DRS to refine the annotation of water yam  
348 (*Dioscorea alata*), an African orphan crop. Indeed, we are moving into an era where thousands of  
349 genome sequences are available and programmes such as the Earth BioGenome Project aim to  
350 sequence all eukaryotic life on Earth<sup>47</sup>. However, genome sequences provide only part of the puzzle:  
351 annotating what they encode will be essential for us to fully utilize this information.

352

## 353 **Materials and methods**

### 354 **Plants**

#### 355 *Plant material and growth conditions*

356 Wild-type *A. thaliana* accession Col-0 was obtained from Nottingham Arabidopsis Stock Centre. The  
357 *vir-1* and VIR-complemented (*VIR::GFP-VIR*) lines were provided by K. Růžička, Brno<sup>48</sup>. The *hen2-2*  
358 (Gabi\_774HO7) mutant was provided by D. Gagliardi, Strasbourg. Seeds were sown on MS10  
359 medium plates, stratified at 4°C for 2 days, germinated in a controlled environment at 22°C under  
360 16-h light/8-h dark conditions and harvested 14 days after transfer to 22°C.

361

#### 362 *Clock phenotype analysis*

363 Clock phenotype experiments were performed as previously described by measuring delayed  
364 fluorescence as a circadian output<sup>49</sup>. Briefly, plants were grown in 12-h light/12-h dark cycles at 22°C  
365 and 80  $\mu\text{mol m}^{-2} \text{sec}^{-1}$  light for 9 days. Next, delayed fluorescence measurements were recorded  
366 every hour for 6 days at constant temperature (22°C) and constant light (20  $\mu\text{mol m}^{-2} \text{sec}^{-1}$  red light  
367 and 20  $\mu\text{mol m}^{-2} \text{sec}^{-1}$  blue light mix). Fast Fourier Transform (FFT) non-linear least-squares fitting to  
368 estimate period length was conducted using Biodare<sup>50</sup>.

369

### 370 **RNA**

371 *RNA isolation*

372 Total RNA was isolated using RNeasy Plant Mini kit (Qiagen) and treated with TURBO DNase (Thermo  
373 Fisher Scientific). The total RNA concentration was measured using a Qubit 1.0 Fluorometer and  
374 Qubit RNA BR Assay Kit (Thermo Fisher Scientific), and RNA quality and integrity were assessed using  
375 a NanoDrop 2000 spectrophotometer (Thermo Fisher Scientific) and Agilent 2200 TapeStation  
376 System (Agilent).

377

378 *mGFP in vitro transcription*

379 The mGFP coding sequence was amplified using CloneAmp HiFi PCR Premix (Clontech) and a forward  
380 primer containing the T7 promoter sequence (Merck; Supplementary table 5). The PCR product was  
381 purified using GeneJET Gel Extraction (Thermo Fisher Scientific) and DNA Cleanup Micro (Thermo  
382 Fisher Scientific) kits, according to the manufacturer's instructions. mGFP was *in vitro* transcribed  
383 using a mMACHINE T7 ULTRA Transcription Kit (Thermo Fisher Scientific) with and  
384 without the anti-reverse cap analogue, according to the manufacturer's instructions. mGFP  
385 transcripts were treated with TURBO DNase, polyA-tailed using *Escherichia coli* poly(A) Polymerase  
386 (E-PAP) and ATP (Thermo Fisher Scientific), and recovered using a MEGAclean kit (Thermo Fisher  
387 Scientific) according to the manufacturer's instructions. The quantity of mGFP mRNAs was measured  
388 using a Qubit 1.0 Fluorometer (as described above), and the quality and integrity was checked using  
389 the NanoDrop 2000 spectrophotometer and agarose-gel electrophoresis. *In vitro* capped and non-  
390 capped mGFP mRNAs were used to prepare the library for DRS using nanopores.

391

392 *RT-PCR and RT-qPCR*

393 Total RNA was reverse transcribed using SuperScript III polymerase or SuperScript IV VILO Master  
394 Mix (Thermo Fisher Scientific) according to the manufacturer's protocol. For RT-PCR, reactions were  
395 performed using the Advantage 2 Polymerase Mix (Clontech) using the primers (Merck) listed in



396 Supplementary table 5. PCR products were gel purified using GeneJET Gel Extraction and DNA  
397 Cleanup Micro kits (Thermo Fisher Scientific), cloned into the pGEM T-Easy vector (Promega;  
398 according to the manufacturer's instruction) and sequenced. For RT-qPCR, reactions were carried  
399 out using the SYBR Green I (Qiagen) mix with the primers (Merck) listed in Supplementary table 5,  
400 following manufacturer's instructions.

401

## 402 **Illumina RNA sequencing**

### 403 *Preparation of libraries for Illumina RNA sequencing*

404 Illumina RNA sequencing libraries from purified mRNA were prepared and sequenced by the Centre  
405 for Genomic Research at University of Liverpool using the NEBNext Ultra Directional RNA Library  
406 Prep Kit for Illumina (New England Biolabs). Paired-end sequencing with a read length of 150 bp was  
407 carried out on an Illumina HiSeq 4000. Illumina RNA libraries from ribosome-depleted RNA were  
408 prepared using the TruSeq Stranded Total RNA with Ribo-Zero Plant kit (Illumina). Paired-end  
409 sequencing with a read length of 100 bp was carried out on an Illumina HiSeq 2000 at the Genomic  
410 Sequencing Unit of the University of Dundee. ERCC RNA Spike-In mixes (Thermo Fisher Scientific)<sup>11,51</sup>  
411 were included in each of the libraries using concentrations advised by the manufacturer.

412

### 413 *Mapping of Illumina RNA sequencing data*

414 Reads were mapped to the TAIR10 reference genome with Araport11 reference annotation using  
415 STAR version 2.6.1<sup>52</sup>, a maximum multimapping rate of 5, a minimum splice junction overhang of  
416 8 nt (3 nt for junctions in the Araport11 reference), a maximum of five mismatches per read and  
417 intron length boundaries of 60–10,000 nt.

418

419 *Differential gene expression analysis using Illumina RNA sequencing data*

420 Transcript-level counts for Illumina RNA sequencing reads were estimated by pseudoalignment with  
421 Salmon version 0.11.2<sup>53</sup>. Counts were aggregated to gene level using tximport<sup>54</sup> and differential gene  
422 expression analyses for *vir-1* mutant vs wild type and *vir-1* mutant vs the VIR-complemented line  
423 were conducted in R version 3.5 using edgeR version 3.24.3<sup>55</sup>.

424

425 *Differentially expressed region analysis using Illumina RNA sequencing data*

426 Mapped read pairs originating from the forward and reverse strands were separated and coverage  
427 tracks were generated using samtools version 1.9<sup>56</sup>. Coverage tracks were then used as input for  
428 DERfinder version 1.16.1<sup>57</sup>. Expressed regions were identified using a minimum coverage of 10  
429 reads, and differential expression between the *vir-1* and VIR-complemented lines was assessed using  
430 the analyseChr method with 50 permutations.

431

432 *Differential exon usage analysis using Illumina RNA sequencing data*

433 Annotated gene models from Araport11 were divided into transcript chunks (i.e. contiguous regions  
434 within which each base is present in the same set of transcript models). Read counts for each chunk  
435 were generated using bedtools version 2.27.1<sup>58</sup> intersect in count mode. Chunk counts were then  
436 processed using DEXseq version 1.28.3<sup>37</sup> to identify differentially expressed chunks between *vir-1*  
437 and VIR-complemented lines, using an absolute log-fold-change threshold of 1 and an FDR threshold  
438 of 0.05. Chunks were annotated as 5' variation if they included a start site of any transcript and as 3'  
439 variation if they contained a termination site. Chunks representing overhangs from alternative donor  
440 or acceptor sites were also classified separately. Internal exons were subclassified as a cassette exon  
441 if they could be wholly contained within any intron.

442

443 **Nanopore DRS**

444 *Preparation of libraries for direct RNA sequencing using nanopores*

445 mRNA was isolated from approximately 75 µg of total RNA using the Dynabeads mRNA purification  
446 kit (Thermo Fisher Scientific) following the manufacturer's instructions. The quality and quantity of  
447 mRNA was assessed using the NanoDrop 2000 spectrophotometer (Thermo Fisher Scientific).  
448 Nanopore libraries were prepared from 1 µg poly(A)+ RNA combined with 1 µl undiluted ERCC RNA  
449 Spike-In mix (Thermo Fisher Scientific) using the nanopore DRS Kit (SQK-RNA001, Oxford Nanopore  
450 Technologies) according to manufacturer's instructions. The poly(T) adapter was ligated to the  
451 mRNA using T4 DNA ligase (New England Biolabs) in the Quick Ligase reaction buffer (New England  
452 Biolabs) for 15 min at room temperature. First-strand cDNA was synthesized by SuperScript III  
453 Reverse Transcriptase (Thermo Fisher Scientific) using the oligo(dT) adapter. The RNA-cDNA hybrid  
454 was then purified using Agencourt RNAClean XP magnetic beads (Beckman Coulter). The sequencing  
455 adapter was ligated to the mRNA using T4 DNA ligase (New England Biolabs) in the Quick Ligase  
456 reaction buffer (New England Biolabs) for 15 min at room temperature followed by a second  
457 purification step using Agencourt beads (as described above). Libraries were loaded onto R9.4  
458 SpotON Flow Cells (Oxford Nanopore Technologies) and sequenced using a 48-h run time.

459 To incorporate cap-dependent ligation of a biotinylated 5' adapter RNA, the following  
460 modifications were introduced into the library preparation protocol. First, 4 µg mRNA was de-  
461 phosphorylated by calf intestinal alkaline phosphatase (Thermo Fisher Scientific) and the 5' cap was  
462 removed by Cap-Clip Acid Pyrophosphatase (Cambio) according to the manufacturer's instructions.  
463 Next, the 5' RNA oligo biotinylated at the 5' end (Integrated DNA Technologies) was ligated to  
464 dephosphorylated, de-capped mRNA using T4 RNA ligase I (New England Biolabs) and mRNA was  
465 purified using Dynabeads MyOne Streptavidin C1 beads (Thermo Fisher Scientific) according to the  
466 manufacturer's instructions. mRNA was assessed for quality and quantity using the NanoDrop 2000  
467 spectrophotometer and used for nanopore DRS library preparation (as described above).

468

469 *Processing of nanopore DRS data*

470 Reads were basecalled with Guppy version 2.3.1 (Oxford Nanopore Technologies) using default RNA  
471 parameters and converted from RNA to DNA fastq using seqkit version 0.10.0<sup>59</sup>. Reads were aligned  
472 to the TAIR10 *A. thaliana* genome<sup>60</sup> and ERCC RNA Spike-In sequences<sup>11,51</sup> using minimap2 version  
473 2.8<sup>13</sup> in spliced mapping mode using a kmer size of 14 and a maximum intron size of 10,000 nt.  
474 Sequence Alignment/Map (SAM) and BAM file manipulations were performed using samtools  
475 version 1.9<sup>56</sup>.

476 Proovread version 2.14.1<sup>14</sup> was used to correct errors in the nanopore DRS reads<sup>15</sup>. Each  
477 nanopore DRS replicate was split into 200 chunks for parallel processing. Each chunk was corrected  
478 using four samples of Illumina poly(A) RNAseq data selected randomly from the 36 Illumina files (six  
479 biological replicates sequenced across six lanes). Illumina reads 1 and 2 were merged into fragments  
480 using FLASH version 1.2.11<sup>61</sup>. Unjoined pairs were discarded. Error correction with proovread was  
481 conducted in sampling-free mode using a minimum nanopore read length of 50 nt. Since both the  
482 Illumina RNAseq and nanopore DRS datasets were strand specific, proovread was modified to  
483 prevent opposite strand mapping between the datasets. Corrected reads were then mapped to the  
484 Araport11 reference genome using minimap2 (as described above). All figures showing gene tracks  
485 with nanopore DRS reads use error-corrected reads.

486

487 *Error profile analysis using nanopore DRS data*

488 Error rate analysis of aligned reads was conducted on ERCC RNA Spike-In mix controls using pysam  
489 version 0.15.2<sup>62</sup> for BAM file parsing. Matches, mismatches, insertions and deletions relative to the  
490 reference were extracted from the cs tag (a more informative version of CIGAR string, output by  
491 minimap2) and normalised by the aligned length of the read. Reference bases and mismatch bases  
492 per position were also recorded and used to assess the frequency of each substitution and indel type  
493 by reference base.

494

495 *Over-splitting analysis of nanopore DRS data*

496 To identify read pairs resulting from over-splitting of the signal originating from a single RNA  
497 molecule, the sequencing summary files produced by Guppy were parsed for sequencing time and  
498 channel identifier and then used to identify pairs of consecutively sequenced reads. Genomic  
499 locations of reads were parsed from minimap2 mappings, and consecutively sequenced reads with  
500 adjacent alignment within a genomic distance of –10 nt to 1,000 nt were identified. Samples  
501 sequenced before or during May 2018 had very low levels of over-splitting (between 0.01% and  
502 0.05% of reads) compared with those sequenced in September 2018 onwards (between 0.8% and  
503 1.5% of reads).

504

505 *Analysis of the potential for internal priming in nanopore DRS data*

506 To determine whether internal priming caused by the RT step can occur in nanopore data, the  
507 location of oligo(A) hexamers within Arabidopsis coding sequence (CDS) regions (Araport11) was  
508 determined and reads that terminated within a 20 nt window of each hexamer were counted. Of the  
509 10,116 CDS oligo(A) runs, 160 (1.58%) had at least one supporting read in one Col-0 nanopore  
510 dataset. Of these, 137 were supported by only one replicate, and only four were supported by all  
511 four biological replicates. In total, 66 (41%) occurred in Araport11-annotated terminal exons,  
512 suggesting that they may be genuine sites of 3' end formation.

513

514 *Poly (A) length estimation using nanopore DRS data*

515 Poly (A) tail length estimations were produced using nanopolish version 0.11.0<sup>18</sup> and added as tags  
516 to BAM files using pysam version 0.15.2<sup>62</sup>. Per gene length distributions were then produced using  
517 Araport11 annotation, and genes with significant changes in length distribution in the *vir-1* mutant

518 compared with the VIR-complemented line were identified using a Kolmogorov–Smirnov test. *p*-  
519 values were adjusted for multiple testing using Benjamini-Hochberg correction.

520

### 521 *3' end analyses of nanopore and Helicos reads*

522 Helicos data were prepared as previously described<sup>20,63</sup>. Positions with three or more supporting  
523 reads were considered to be peaks of nanopore or Helicos 3' ends. The distance between each  
524 nanopore peak and the nearest Helicos peak was then determined. In all, 37% of nanopore peaks  
525 occurred at the same position as a Helicos peak, and the standard deviation in distance was 12.5 nt.  
526 To determine the percentage of nanopore DRS 3' ends mapping within annotated genic features,  
527 transcripts were first flattened into a single record per gene. Exonic annotation was given priority  
528 over intronic or intergenic annotation and CDS annotation was given priority over UTR annotation.  
529 Reads were assigned to genes if they overlapped them by >20% of their aligned length, and the  
530 annotated feature type of the 3' end position was determined. Counts were generated both for all  
531 reads and for unique positions per gene.

532

### 533 *Isoform collapsing of nanopore DRS data*

534 Error-corrected full-length alignments were collapsed into clusters of reads with identical sets of  
535 introns. These clusters were then subdivided by 3' end location by using a Gaussian kernel with  
536 sigma of 100 to find local minima between read ends, which were used as cut points to separate  
537 clusters. The read with the longest aligned length in each cluster was used as the representative in  
538 the figure.

539

### 540 *Splicing analysis of nanopore DRS and Illumina RNAseq data*

541 Splice junction locations, their flanking sequences and the read counts supporting them were  
542 extracted from Illumina RNA sequencing, nanopore DRS and nanopore error-corrected DRS reads

543 using pysam version 0.14<sup>62</sup>, as well as from Araport11<sup>64</sup> and AtRTD2<sup>25</sup> reference annotations. Splice  
544 junctions at the same position but on the opposite strand were counted independently. Junctions  
545 were classified by their most likely snRNP machinery using Biopython version 1.71<sup>65</sup>, with position  
546 weight matrices as previously calculated<sup>28</sup>. Position weight matrices were scored against the  
547 sequence -3 nt to +10 nt of the donor site and -14 nt to +3 nt of the acceptor site. Position weight  
548 matrix scores greater than zero indicate a match to the motif, while scores of around zero, or  
549 negative scores, indicate background frequencies or deviation from the motif. Positive scores were  
550 normalized into the range 50–100 as done previously<sup>28</sup>. Junctions with U12 donor scores of >75 and  
551 U12 acceptor scores of >65 were classified as U12 junctions, while junctions with U2 donor and  
552 acceptor scores of >60 were classified as U2, as done previously<sup>25</sup>. Junctions were further  
553 categorized as canonical or non-canonical based on the presence or absence, respectively, of GT/AG  
554 intron border sequences. For isoform analysis, linked splices from the same read were extracted  
555 from full-length nanopore error-corrected reads and counted to create unique sets of splice  
556 junctions. Intronless reads were not counted. UpSet plots were generated in Python 3.6 using the  
557 package upsetplot<sup>66</sup>.

558

### 559 *Validation of novel splice sites*

560 To validate novel splice junctions detected in nanopore DRS, five splice sites out of the 20 most  
561 highly expressed splice sites were selected for further validation; three of the five selected splice  
562 sites were successfully amplified in RT-PCR followed by Sanger sequencing (described above).

563

### 564 *5' adapter detection analyses using nanopore DRS data*

565 To produce positive and negative examples of 5' adapter-containing sequences, 5' soft-clipped  
566 regions were extracted from aligned reads for the Col-0 replicate 1 datasets (with and without  
567 adapter ligation) using pysam<sup>62</sup>. These soft-clipped sequences were then searched for the presence

568 of the GeneRacer adapter sequence using BLASTN version 2.7.1<sup>67</sup>. Two rules were initially applied to  
569 filter BLASTN results: a match of 10 nt or more to the 44 nt adapter, and an E value of <100. Reads  
570 from the adapter-containing dataset that failed one or both criteria were used as negative training  
571 examples. A final rule requiring the match to the adapter sequence to occur directly adjacent to the  
572 aligned read was also applied. Reads from the adapter-containing dataset that passed all three rules  
573 were used as the positive training set. When comparing the ratio of positive to negative examples  
574 between datasets containing the adapter and those generated from the same tissue but without the  
575 adapter, we found that these three rules gave a signal-to-noise ratio of >5,000 (Supplementary  
576 table 2).

577 In all, 72,083 positive and 123,739 negative training examples from Col-0 tissue replicate 1  
578 were collected to train the neural network. We then estimated the amount of raw signal from the 5'  
579 end of the squiggle that was required on average to capture the 5' adapter. To do this, we used  
580 nanopolish eventalign version 0.11.0<sup>68</sup> to identify the interval in the raw read corresponding to the  
581 mRNA alignment to the reference in the positive examples of 5' adapter-containing sequences. Since  
582 the adapter can be identified immediately adjacent to the alignment in sequence space for these  
583 reads, the signal after the event alignment should correspond to the signal originating from the  
584 adapter. The median length of these signals was 1,441 points, and 96% of the signals were <3,000  
585 points. Therefore, we used a window size of 3,000 to make predictions.

586 The model was trained in Python 3.6 using Keras version 2.2.4 with the Tensorflow version  
587 1.10.0 backend<sup>69,70</sup>. A ResNet-style architecture was used<sup>71</sup>, composed of eight residual blocks  
588 containing two convolutional layers of kernel size 5 and a shortcut convolution with kernel size 1.  
589 Down-sampling using maximum pooling layers with a stride of 2 was used between each residual  
590 block. A penultimate densely connected layer of size 16 was used, with training dropout of 0.5. Input  
591 signals were standardized by median absolute deviation scaling across the whole read before the  
592 final 3,000 points were taken, and the negative samples were augmented by addition of random



593 internal signals from reads and pure Gaussian, multi-Gaussian and perlin noise signals<sup>72</sup>. The whole  
594 dataset was also augmented on the fly during training by the addition of Gaussian noise with a  
595 standard deviation of 0.1. Models were trained for a maximum of 100 epochs (batch size of 128, 100  
596 batches per epoch, positive and negative examples sampled in a 1:1 ratio) using the RMSprop  
597 optimizer with an initial learning rate of 0.001, which was reduced by a factor of 10 after three  
598 epochs with no reduction in validation loss. Early stopping was used after five epochs with no  
599 reduction in validation loss. We found that a number of negative training examples from the ends of  
600 reads, but not from internal positions, were likely to be incorrectly labelled by the BLASTN method,  
601 because the model predicted them to contain adapters. We therefore filtered these to clean the  
602 training data, before repeating the training process. Model performance was evaluated using five-  
603 fold cross validation and by testing on independently generated datasets from Col-0 replicate 2,  
604 produced with and without the adapter ligation protocol (Supplementary figure 3B, C)<sup>69,70</sup>.

605 To evaluate the reduction in 3' bias of adapter-ligated datasets, we used Araport11 exon  
606 annotations to produce per base coverage for each gene in the Col-0 replicate 2 dataset. Coverage  
607 was generated separately for reads predicted to contain adapters and for those predicted not to  
608 contain adapters. Leading zeros at the extreme 5' and 3' ends of genes were assumed to be caused  
609 by mis-annotation of UTRs and so were trimmed. The quartile coefficient of variation (interquartile  
610 range / median) was then used as a robust measure of variation in coverage across each gene. To  
611 validate the 5' ends of adapter-ligated reads with orthogonal data, full-length cDNA clone sequences  
612 were downloaded from RIKEN RAFL (Arabidopsis full-length cDNA clones)<sup>23</sup>. These were mapped  
613 with minimap2<sup>13</sup> in spliced mode. The distance from each nanopore alignment 5' end to the nearest  
614 RIKEN RAFL alignment<sup>23</sup>. 5' end was calculated using bedtools<sup>58</sup>. The amount of 5' end sequence that  
615 is rescued when 5' adapters are used was estimated by identifying the largest peak in 5' end  
616 locations per gene in the absence of adapter, and then measuring how this peak shifted using reads  
617 predicted to contain adapters.

618

619 *Differential error site analysis using nanopore DRS data*

620 To detect sites of Virilizer-dependent m<sup>6</sup>A RNA modifications, we developed scripts to test changes  
621 in per base error profiles of aligned reads. Pileup columns for each position with coverage of >10  
622 reads were generated using pysam<sup>62</sup> and reads in each column were categorized as either A, C, G, T  
623 or indel. The relative proportions of each category were counted. Counts from replicates of the  
624 same experimental condition were aggregated and a 2×5 contingency table was produced for each  
625 base comparing *vir-1* and VIR-complemented lines. A G-test was performed to identify bases with  
626 significantly altered error profiles. For bases with a *p*-value of <0.05, G-tests for homogeneity  
627 between replicates of the same condition were then performed. Bases where the sum of the G  
628 statistic for homogeneity tests was greater than the G statistic for the *vir-1* and VIR-complemented  
629 line comparison were filtered. Multiple testing correction was carried out using the Benjamini-  
630 Hochberg method, and an FDR threshold of 0.05 was used. The log<sub>2</sub> fold change in mismatch to  
631 match ratio (compared with the reference base) between the *vir-1* and VIR-complemented lines was  
632 calculated using Haldane correction for zero counts. Bases that had a log fold change of >1 were  
633 considered to have a reduced error rate in the *vir-1* mutant.

634 To identify motifs enriched at sites with a reduced error rate, reduced error rate sites were  
635 increased in size by 5 nt in each direction and overlapping sites were merged using bedtools version  
636 2.27.1<sup>58</sup>. Sequences corresponding to these sites were extracted from the TAIR10 reference and  
637 over-represented motifs were detected in the sequences using MEME version 5.0.2<sup>73</sup>, run in zero or  
638 one occurrence mode with a motif size range of 5–7 and a minimum requirement of 100 sequence  
639 matches. The presence of these motifs at error sites was then detected using FIMO version 5.0.2<sup>74</sup>. A  
640 relaxed FDR threshold of 0.1 was used with FIMO to capture more degenerate motifs matching the  
641 m<sup>6</sup>A consensus.

642

643 *Differential gene expression analysis using nanopore DRS data*

644 Gene level counts were produced for each nanopore DRS replicate using featureCounts version  
645 1.6.3<sup>75</sup> in long-read mode with strand-specific counting. Differential expression analysis between the  
646 *vir-1* and VIR-complemented lines was then performed in R version 3.5 using edgeR version 3.24.3<sup>55</sup>.

647

648 *Identification of alternative 3' end positions and chimeric RNA using nanopore DRS data*

649 Genes with differential 3' end usage were identified by producing 3' profiles of reads which  
650 overlapped with each annotated gene locus by >20%. These profiles were then compared between  
651 the *vir-1* and VIR-complemented lines using a Kolmogorov–Smirnov test to identify changes.  
652 Multiple testing correction was performed using the Benjamini-Hochberg method. To approximately  
653 identify the direction and distance of the change, the normalized single base level histograms of the  
654 VIR-complemented line profile was subtracted from that of the mutant profile, and the minimum  
655 and maximum points in the difference profile were identified. These represent the sites of most  
656 reduced and increased relative usage, respectively. Results were filtered for an FDR of <0.05 and  
657 absolute change of site >13 nt (the measured error range of nanopore DRS 3' end alignment). The  
658 presence of m<sup>6</sup>A modifications at genes with differential 3' end usage was assessed using bedtools  
659 intersect<sup>58</sup>, and significant enrichment of m<sup>6</sup>A at these genes was tested using a hypergeometric test  
660 (using all expressed genes as the background population).

661 To identify genes with a significant increase in chimeras in the *vir-1* mutant, we used  
662 Araport11 annotation<sup>64</sup> to identify reads that overlapped with multiple adjacent gene loci (i.e.  
663 chimeric reads) and those originating from a single locus (i.e. non-chimeric reads). To reduce false  
664 positives caused by reads mapping across tandem duplicated loci, reads mapping to genes  
665 annotated in PTGBase<sup>76</sup> were filtered out. Chimeric reads were considered to originate from the  
666 most upstream gene with which they overlapped. We pooled reads from replicates for each  
667 experimental condition and used 50 bootstrapped samples (75% of the total data without

668 replacement) to estimate the ratio of chimeric to non-chimeric reads at each gene in each condition.  
669 Haldane correction for zero counts was applied. The distributions of chimeric to non-chimeric ratios  
670 in the *vir-1* and VIR-complemented lines were tested using a Kolmogorov–Smirnov test to detect loci  
671 with altered chimera production. All possible pairwise combinations of VIR-complemented and *vir-1*  
672 bootstraps were then compared to produce a distribution of estimates of change in the chimeric to  
673 non-chimeric ratio in the *vir-1* mutant. Loci that had more than one chimeric read in *vir-1*,  
674 demonstrated at least a two-fold increase in the chimeric read ratio in >50% of bootstrap  
675 comparisons and were significantly changed at a FDR of <0.05 were considered to be sites of  
676 increased chimeric RNA formation in the *vir-1* mutant.

677

## 678 **miCLIP**

### 679 *Preparation of miCLIP libraries*

680 Total RNA for miCLIP was isolated from 7.5 mg of 14-day old Arabidopsis Col-0 seedlings as  
681 previously described<sup>77</sup>. mRNA was isolated from ~1 mg total RNA using oligo(dT) and streptavidin  
682 paramagnetic beads (PolyATtract mRNA Isolation Systems, Promega) according to the  
683 manufacturer's instructions. miCLIP was carried out using 15 µg mRNA as previously described<sup>78</sup>  
684 using an antibody against N6-methyladenosine (#202 003 Synaptic Systems), with minor  
685 modifications. No-antibody controls were processed throughout the experiment. RNA-antibody  
686 complexes were separated by 4–12% Bis-Tris gel electrophoresis at 180 V for 50 min and transferred  
687 to nitrocellulose membranes (Protran BA85 0.45µm, GE Healthcare) at 30 V for 60 min. Membranes  
688 were then exposed to Medical X-Ray Film Blue (Agfa) at –80°C overnight. Reverse transcription was  
689 carried out using barcoded RT primers: RT41, RT48, RT49 and RT50 (Integrated DNA Technologies;  
690 Supplementary table 5). After reverse transcription, one cDNA fraction corresponding to 70–200 nt  
691 was gel purified after 6% TBE-urea gel electrophoresis (Thermo Fisher Scientific). After the final PCR  
692 step, all libraries were pooled together, purified using Agencourt Ampure XP magnetic beads

693 (Beckman Coulter) and eluted in nuclease-free water. Paired-end sequencing with a read length of  
694 100 bp was carried out on an Illumina MiSeq v2 at Edinburgh Genomics, University of Edinburgh.  
695 Input sample libraries were prepared using NEBNext Ultra Directional RNA Library Prep Kit for  
696 Illumina (New England Biolabs) and sequenced on an Illumina HiSeq2000 at the Tayside Centre for  
697 Genomics Analysis, University of Dundee, with a pair-end read length of 75 bp.

698

#### 699 *Processing of miCLIP sequencing data*

700 miCLIP data were assessed for quality using FastQC version 0.11.8<sup>79</sup> and MultiQC version 1.7<sup>80</sup>. Only  
701 the forward read was used for analysis because the miCLIP site is located at the 5' position of the  
702 forward read. 3' adapter and poly(A) sequences were trimmed using cutadapt version 1.18<sup>81</sup> and  
703 unique molecular identifiers were extracted from the 5' end of the reads using UMI-tools version  
704 0.5.5<sup>82</sup>. Immunoprecipitation and no-antibody controls were demultiplexed and multiplexing  
705 barcodes were trimmed using seqkit version 0.10.0<sup>59</sup>. Reads were mapped to the TAIR10 reference  
706 genome with Araport11 reference annotation<sup>64</sup> using STAR version 2.6.1<sup>52</sup>, a maximum  
707 multimapping rate of 5, a minimum splice junction overhang of 8 nt (3 nt for junctions in the  
708 Araport11 reference), a maximum of five mismatches per read, and intron length boundaries of 60–  
709 10,000 nt. SAM and BAM file manipulations were performed using samtools version 1.9<sup>56</sup>. Removal  
710 of PCR duplicates was then performed using UMI-tools in a directional model<sup>82</sup>. miCLIP 5' coverage  
711 and matched input 5' coverage tracks were generated using bedtools version 2.27.1<sup>58</sup> and these  
712 were used to call miCLIP peaks at single nucleotide resolution with Piranha version 1.2.1<sup>83</sup> and  
713 relaxed *p*-value thresholds of 0.5. Reproducible peaks across pairwise combinations of the three  
714 replicates were identified by irreproducible discovery rate (IDR) analysis using Python package idr  
715 version 2.0.3 with an IDR threshold of 0.05<sup>84</sup>. The final set of peaks was identified by pooling the  
716 three replicates, re-analysing using Piranha, ranking the peaks by FDR and selecting the top N peaks,

717 where N is the smallest number of reproducible peaks discovered by pairwise comparisons of the  
718 three replicates. This yielded 141,198 unique nucleotide-level miCLIP peaks.

719

#### 720 **m<sup>6</sup>A liquid chromatography–mass spectroscopy analysis**

721 m<sup>6</sup>A content analysis using liquid chromatography–mass spectroscopy (LC-MS) was performed as  
722 previously described<sup>85</sup>. Chromatography was carried out by the FingerPrints Proteomics facility,  
723 University of Dundee.

724

#### 725 **Code availability**

726 All scripts, pipelines and notebooks used for this study are available on GitHub at  
727 [https://github.com/bartongroup/Simpson\\_Barton\\_Nanopore\\_1](https://github.com/bartongroup/Simpson_Barton_Nanopore_1)

728

#### 729 **Data availability**

730 Sequencing datasets described in this study have been deposited at the European Nucleotide  
731 Archive understudy accession number PRJEB32782.

732

#### 733 **Acknowledgements**

734 This work was funded by BBSRC grants BB/J00247X/1, BB/M004155/1, BB/M010066/1, the  
735 University of Dundee Global Challenges Research Fund and the European Union’s Horizon 2020  
736 research and innovation programme under Marie Skłodowska-Curie grant agreement No. 799300.  
737 The m<sup>6</sup>A LC-MS analysis was carried out by Abdel Atrih of the FingerPrints Proteomics Facility,  
738 University of Dundee, which is supported by a Wellcome Trust Technology Platform award  
739 (097945/B/11/Z). We thank Kasper Rasmussen and Csaba Hornyik for their comments on the  
740 manuscript.

741

742 **Author contributions**

743 GGS, NJS and AVS conceived the study; KK, AVS and KM designed and performed the experiments;  
744 MTP and NJS undertook data analysis; PDG undertook the clock experiments, supervised by AH; GGS  
745 and GJB supervised the study; GGS, MTP and AVS wrote the paper. All authors read and commented  
746 on the text.

747

748 **Competing interests**

749 No competing interests declared.

750

751 **References**

752

- 753 1 Meyer, K. D. & Jaffrey, S. R. Rethinking m<sup>6</sup>A readers, writers, and erasers. *Annual*  
754 *Review of Cell and Developmental Biology* **33**, 319-342, doi:10.1146/annurev-cellbio-  
755 100616-060758 (2017).
- 756 2 Roundtree, I. A., Evans, M. E., Pan, T. & He, C. Dynamic RNA modifications in gene  
757 expression regulation. *Cell* **169**, 1187-1200, doi:10.1016/j.cell.2017.05.045 (2017).
- 758 3 Jan, C. H., Friedman, R. C., Ruby, J. G. & Bartel, D. P. Formation, regulation and  
759 evolution of *Caenorhabditis elegans* 3' UTRs. *Nature* **469**, 97-101,  
760 doi:10.1038/nature09616 (2011).
- 761 4 Houseley, J. & Tollervey, D. Apparent non-canonical *trans*-splicing is generated by  
762 reverse transcriptase *in vitro*. *Plos One* **5**, doi:10.1371/journal.pone.0012271 (2010).
- 763 5 Mourão, K. *et al.* Detection and mitigation of spurious antisense expression with  
764 RoSA. *F1000Research* **8**, doi:10.12688/f1000research.18952.1 (2019).
- 765 6 Helm, M. & Motorin, Y. Detecting RNA modifications in the epitranscriptome: predict  
766 and validate. *Nat Rev Genet* **18**, 275-291, doi:10.1038/nrg.2016.169 (2017).
- 767 7 Steijger, T. *et al.* Assessment of transcript reconstruction methods for RNA-seq. *Nat*  
768 *Methods* **10**, 1177-1184, doi:10.1038/Nmeth.2714 (2013).
- 769 8 Garalde, D. R. *et al.* Highly parallel direct RNA sequencing on an array of nanopores.  
770 *Nature Methods* **15**, 201, doi:10.1038/nmeth.4577 (2018).
- 771 9 Ruzicka, K. *et al.* Identification of factors required for m<sup>6</sup>A mRNA methylation in  
772 *Arabidopsis* reveals a role for the conserved E3 ubiquitin ligase HAKAI. *New Phytol*  
773 **215**, 157-172, doi:10.1111/nph.14586 (2017).
- 774 10 Lange, H. *et al.* The RNA helicases AtMTR4 and HEN2 target specific subsets of  
775 nuclear transcripts for degradation by the nuclear exosome in *Arabidopsis thaliana*.  
776 *PLoS Genet* **10**, doi:10.1371/journal.pgen.1004564 (2014).
- 777 11 Jiang, L. *et al.* Synthetic spike-in standards for RNA-seq experiments. *Genome Res* **21**,  
778 1543-1551, doi:10.1101/gr.121095.111 (2011).

- 779 12 Reid, L. H. *et al.* Proposed methods for testing and selecting the ERCC external RNA  
780 controls. *Bmc Genomics* **6**, doi:10.1186/1471-2164-6-150 (2005).
- 781 13 Li, H. Minimap2: pairwise alignment for nucleotide sequences. *Bioinformatics* **34**,  
782 3094-3100, doi:10.1093/bioinformatics/bty191 (2018).
- 783 14 Hackl, T., Hedrich, R., Schultz, J. & Forster, F. proovread: large-scale high-accuracy  
784 PacBio correction through iterative short read consensus. *Bioinformatics* **30**, 3004-  
785 3011, doi:10.1093/bioinformatics/btu392 (2014).
- 786 15 Depledge, D. P. *et al.* Direct RNA sequencing on nanopore arrays redefines the  
787 transcriptional complexity of a viral pathogen. *Nat Commun* **10**, 754,  
788 doi:10.1038/s41467-019-08734-9 (2019).
- 789 16 Payne, A., Holmes, N., Rakyan, V. & Loose, M. BulkVis: a graphical viewer for Oxford  
790 nanopore bulk FAST5 files. *Bioinformatics*, doi:10.1093/bioinformatics/bty841  
791 (2018).
- 792 17 Matsui, A. *et al.* Novel stress-inducible antisense RNAs of protein-coding loci are  
793 synthesized by RNA-dependent RNA polymerase. *Plant Physiology* **175**, 457-472,  
794 doi:10.1104/pp.17.00787 (2017).
- 795 18 Workman, R. E. *et al.* Nanopore native RNA sequencing of a human poly(A)  
796 transcriptome. *bioRxiv*, 459529, doi:10.1101/459529 (2018).
- 797 19 Lima, S. A. *et al.* Short poly(A) tails are a conserved feature of highly expressed  
798 genes. *Nat Struct Mol Biol* **24**, 1057–1063, doi:10.1038/nsmb.3499 (2017).
- 799 20 Duc, C., Sherstnev, A., Cole, C., Barton, G. J. & Simpson, G. G. Transcription  
800 termination and chimeric RNA formation controlled by *Arabidopsis thaliana* FPA.  
801 *PLOS Genetics* **9**, e1003867, doi:10.1371/journal.pgen.1003867 (2013).
- 802 21 Hornyik, C., Terzi, L. C. & Simpson, G. G. The spen family protein FPA controls  
803 alternative cleavage and polyadenylation of RNA. *Developmental Cell* **18**, 203-213,  
804 doi:10.1016/j.devcel.2009.12.009.
- 805 22 Rigal, M., Kevei, Z., Pelissier, T. & Mathieu, O. DNA methylation in an intron of the  
806 *IBM1* histone demethylase gene stabilizes chromatin modification patterns. *EMBO J*  
807 **31**, 2981-2993, doi:10.1038/emboj.2012.141 (2012).
- 808 23 Seki, M. *et al.* Functional annotation of a full-length *Arabidopsis* cDNA collection.  
809 *Science* **296**, 141-145, doi:DOI 10.1126/science.1071006 (2002).
- 810 24 Ushijima, T. *et al.* Light controls protein localization through phytochrome-mediated  
811 alternative promoter selection. *Cell* **171**, 1316-1325, doi:10.1016/j.cell.2017.10.018  
812 (2017).
- 813 25 Zhang, R. *et al.* A high quality *Arabidopsis* transcriptome for accurate transcript-level  
814 analysis of alternative splicing. *Nucleic Acids Res* **45**, 5061-5073,  
815 doi:10.1093/nar/gkx267 (2017).
- 816 26 Schon, M. A., Kellner, M. J., Plotnikova, A., Hofmann, F. & Nodine, M. D. NanoPARE:  
817 parallel analysis of RNA 5' ends from low-input RNA. *Genome Res* **28**, 1931-1942,  
818 doi:10.1101/gr.239202.118 (2018).
- 819 27 Pose, D. *et al.* Temperature-dependent regulation of flowering by antagonistic FLM  
820 variants. *Nature* **503**, 414-417, doi:10.1038/nature12633 (2013).
- 821 28 Sheth, N. *et al.* Comprehensive splice-site analysis using comparative genomics.  
822 *Nucleic Acids Res* **34**, 3955-3967, doi:10.1093/nar/gkl556 (2006).



- 823 29 Dehghannasiri, R., Szabo, L. & Salzman, J. Ambiguous splice sites distinguish circRNA  
824 and linear splicing in the human genome. *Bioinformatics*,  
825 doi:10.1093/bioinformatics/bty785 (2018).
- 826 30 Linder, B. *et al.* Single-nucleotide-resolution mapping of m6A and m6Am throughout  
827 the transcriptome. *Nat Methods* **12**, 767-772, doi:10.1038/nmeth.3453 (2015).
- 828 31 Shen, L. S. *et al.* N<sup>6</sup>-methyladenosine RNA modification regulates shoot stem cell  
829 fate in Arabidopsis. *Dev Cell* **38**, 186-200, doi:10.1016/j.devcel.2016.06.008 (2016).
- 830 32 Anderson, S. J. *et al.* N<sup>6</sup>-methyladenosine inhibits local ribonucleolytic cleavage to  
831 stabilize mRNAs in Arabidopsis. *Cell Rep* **25**, 1146-1157,  
832 doi:10.1016/j.celrep.2018.10.020 (2018).
- 833 33 Ke, S. *et al.* A majority of m6A residues are in the last exons, allowing the potential  
834 for 3' UTR regulation. *Genes Dev* **29**, 2037-2053, doi:10.1101/gad.269415.115  
835 (2015).
- 836 34 Wang, X. *et al.* N<sup>6</sup>-methyladenosine-dependent regulation of messenger RNA  
837 stability. *Nature* **505**, 117-120, doi:10.1038/nature12730 (2014).
- 838 35 McClung, C. R. The genetics of plant clocks. *Adv Genet* **74**, doi:10.1016/b978-0-12-  
839 387690-4.00004-0 (2011).
- 840 36 Lidder, P., Gutierrez, R. A., Salome, P. A., McClung, C. R. & Green, P. J. Circadian  
841 control of messenger RNA stability. Association with a sequence-specific messenger  
842 RNA decay pathway. *Plant Physiol* **138**, 2374-2385, doi:10.1104/pp.105.060368  
843 (2005).
- 844 37 Anders, S., Reyes, A. & Huber, W. Detecting differential usage of exons from RNA-seq  
845 data. *Genome Research* **22**, 2008-2017, doi:10.1101/gr.133744.111 (2012).
- 846 38 Pontier, D. *et al.* The m6A pathway protects the transcriptome integrity by restricting  
847 RNA chimera formation in plants. *Life Sci Alliance* **2**, doi:10.26508/lsa.201900393  
848 (2019).
- 849 39 Lin, S., Choe, J., Du, P., Triboulet, R. & Gregory, R. I. The m<sup>6</sup>A methyltransferase  
850 METTL3 promotes translation in human cancer cells. *Mol Cell* **62**, 335-345,  
851 doi:10.1016/j.molcel.2016.03.021 (2016).
- 852 40 Pendleton, K. E. *et al.* The U6 snRNA m<sup>6</sup>A methyltransferase METTL16 regulates SAM  
853 synthetase intron retention. *Cell* **169**, 824-835 e814, doi:10.1016/j.cell.2017.05.003  
854 (2017).
- 855 41 Chan, S. L. *et al.* CPSF30 and Wdr33 directly bind to AAUAAA in mammalian mRNA 3'  
856 processing. *Gene Dev* **28**, 2370-2380, doi:10.1101/gad.250993.114 (2014).
- 857 42 Schonemann, L. *et al.* Reconstitution of CPSF active in polyadenylation: recognition  
858 of the polyadenylation signal by WDR33. *Gene Dev* **28**, 2381-2393,  
859 doi:10.1101/gad.250985.114 (2014).
- 860 43 Stevens, A. T., Howe, D. K. & Hunt, A. G. Characterization of mRNA polyadenylation  
861 in the apicomplexa. *Plos One* **13**, doi:10.1371/journal.pone.0203317 (2018).
- 862 44 Kaul, S. *et al.* Analysis of the genome sequence of the flowering plant *Arabidopsis*  
863 *thaliana*. *Nature* **408**, 796-815, doi:10.1038/35048692 (2000).
- 864 45 United Nations, D. o. E. a. S. A., Population Division. in *Working Paper No.*  
865 *ESA/P/WP/248* (2017).
- 866 46 Chang, Y. *et al.* The draft genomes of five agriculturally important African orphan  
867 crops. *Gigascience* **8**, doi:10.1093/gigascience/giy152 (2018).

- 868 47 Lewin, H. A. *et al.* Earth BioGenome Project: Sequencing life for the future of life. *P*  
869 *Natl Acad Sci USA* **115**, 4325-4333, doi:10.1073/pnas.1720115115 (2018).
- 870 48 Růžička, K. *et al.* Identification of factors required for m6A mRNA methylation in  
871 *Arabidopsis* reveals a role for the conserved E3 ubiquitin ligase HAKAI. *New*  
872 *Phytologist* **215**, 157-172, doi:10.1111/nph.14586 (2017).
- 873 49 Gould, P. D. *et al.* Delayed fluorescence as a universal tool for the measurement of  
874 circadian rhythms in higher plants. *The Plant Journal* **58**, 893-901,  
875 doi:10.1111/j.1365-313X.2009.03819.x (2009).
- 876 50 Moore, A., Zielinski, T. & Millar, A. J. in *Plant Circadian Networks: Methods and*  
877 *Protocols* (ed Dorothee Staiger) 13-44 (Springer New York, 2014).
- 878 51 Lee, H., Pine, P. S., McDaniel, J., Salit, M. & Oliver, B. External RNA controls  
879 consortium beta version update. *Journal of genomics* **4**, 19-22,  
880 doi:10.7150/jgen.16082 (2016).
- 881 52 Dobin, A. *et al.* STAR: ultrafast universal RNA-seq aligner. *Bioinformatics* **29**, 15-21,  
882 doi:10.1093/bioinformatics/bts635 (2013).
- 883 53 Patro, R., Duggal, G., Love, M. I., Irizarry, R. A. & Kingsford, C. Salmon provides fast  
884 and bias-aware quantification of transcript expression. *Nature Methods* **14**, 417,  
885 doi:10.1038/nmeth.4197 (2017).
- 886 54 Sonesson, C., Love, M. & Robinson, M. Differential analyses for RNA-seq: transcript-  
887 level estimates improve gene-level inferences [version 2; peer review: 2 approved].  
888 *F1000Research* **4**, doi:10.12688/f1000research.7563.2 (2016).
- 889 55 Robinson, M. D., McCarthy, D. J. & Smyth, G. K. edgeR: a Bioconductor package for  
890 differential expression analysis of digital gene expression data. *Bioinformatics* **26**,  
891 139-140, doi:10.1093/bioinformatics/btp616 (2010).
- 892 56 Wysocker, A. *et al.* The sequence alignment/map format and SAMtools.  
893 *Bioinformatics* **25**, 2078-2079, doi:10.1093/bioinformatics/btp352 (2009).
- 894 57 Collado-Torres, L. *et al.* Flexible expressed region analysis for RNA-seq with  
895 derfinder. *Nucleic Acids Res* **45**, e9, doi:10.1093/nar/gkw852 (2017).
- 896 58 Quinlan, A. R. & Hall, I. M. BEDTools: a flexible suite of utilities for comparing  
897 genomic features. *Bioinformatics* **26**, 841-842, doi:10.1093/bioinformatics/btq033  
898 (2010).
- 899 59 Shen, W., Le, S., Li, Y. & Hu, F. SeqKit: a cross-platform and ultrafast toolkit for  
900 FASTA/Q file manipulation. *PLOS ONE* **11**, e0163962,  
901 doi:10.1371/journal.pone.0163962 (2016).
- 902 60 The *Arabidopsis* Genome, I. Analysis of the genome sequence of the flowering plant  
903 *Arabidopsis thaliana*. *Nature* **408**, 796-815, doi:10.1038/35048692 (2000).
- 904 61 Magoč, T. & Salzberg, S. L. FLASH: fast length adjustment of short reads to improve  
905 genome assemblies. *Bioinformatics* **27**, 2957-2963,  
906 doi:10.1093/bioinformatics/btr507 (2011).
- 907 62 Heger, A., Belgrad, T. G., Goodson, M., & Jacobs, K. pysam: Python interface for the  
908 SAM/BAM sequence alignment and mapping format. (2014).
- 909 63 Schurch, N. J. *et al.* Improved Annotation of 3' Untranslated Regions and Complex  
910 Loci by Combination of Strand-Specific Direct RNA Sequencing, RNA-Seq and ESTs.  
911 *PLOS ONE* **9**, e94270, doi:10.1371/journal.pone.0094270 (2014).
- 912 64 Cheng, C.-Y. *et al.* Araport11: a complete reannotation of the *Arabidopsis thaliana*  
913 reference genome. *The Plant Journal* **89**, 789-804, doi:10.1111/tpj.13415 (2017).

- 914 65 Dalke, A. *et al.* Biopython: freely available Python tools for computational molecular  
915 biology and bioinformatics. *Bioinformatics* **25**, 1422-1423,  
916 doi:10.1093/bioinformatics/btp163 (2009).
- 917 66 Nothman, J. *upsetplot*, <<https://github.com/jnothman/UpSetPlot>> (2018).
- 918 67 Camacho, C. *et al.* BLAST+: architecture and applications. *BMC bioinformatics* **10**,  
919 421-421, doi:10.1186/1471-2105-10-421 (2009).
- 920 68 Loman, N. J., Quick, J. & Simpson, J. T. A complete bacterial genome assembled *de*  
921 *novo* using only nanopore sequencing data. *Nature Methods* **12**, 733,  
922 doi:10.1038/nmeth.3444 (2015).
- 923 69 Chollet, F. *Keras*, <<https://github.com/fchollet/keras>> (2018).
- 924 70 Abadi, M. *et al.* TensorFlow: large-scale machine learning on heterogeneous  
925 distributed systems. (2016).
- 926 71 Kaiming He, X. Z., Shaoqing Ren, Jian Sun. Deep residual learning for image  
927 recognition. (2015).
- 928 72 Wick, R. R., Judd, L. M. & Holt, K. E. Deepbiner: Demultiplexing barcoded Oxford  
929 Nanopore reads with deep convolutional neural networks. *PLoS Comput Biol* **14**,  
930 e1006583, doi:10.1371/journal.pcbi.1006583 (2018).
- 931 73 Bailey, T. L. *et al.* MEME Suite: tools for motif discovery and searching. *Nucleic Acids*  
932 *Research* **37**, W202-W208, doi:10.1093/nar/gkp335 (2009).
- 933 74 Grant, C. E., Bailey, T. L. & Noble, W. S. FIMO: scanning for occurrences of a given  
934 motif. *Bioinformatics* **27**, 1017-1018, doi:10.1093/bioinformatics/btr064 (2011).
- 935 75 Liao, Y., Smyth, G. K. & Shi, W. The Subread aligner: fast, accurate and scalable read  
936 mapping by seed-and-vote. *Nucleic acids Res* **41**, e108-e108, doi:10.1093/nar/gkt214  
937 (2013).
- 938 76 Yu, J. *et al.* PTGBase: an integrated database to study tandem duplicated genes in  
939 plants. *Database* **2015**, doi:10.1093/database/bav017 (2015).
- 940 77 Quesada, V., Macknight, R., Dean, C. & Simpson, G. G. Autoregulation of *FCA* pre-  
941 mRNA processing controls Arabidopsis flowering time. *The EMBO Journal* **22**, 3142-  
942 3152, doi:10.1093/emboj/cdg305 (2003).
- 943 78 Grozhik, A. V., Linder, B., Olarerin-George, A. O. & Jaffrey, S. R. Mapping m<sup>6</sup>A at  
944 individual-nucleotide resolution using crosslinking and immunoprecipitation  
945 (miCLIP). *Methods in molecular biology* **1562**, 55-78, doi:10.1007/978-1-4939-6807-  
946 7\_5 (2017).
- 947 79 Andrews, S. FastQC: a quality control tool for high throughput sequence data.  
948 (2010).
- 949 80 Ewels, P., Magnusson, M., Källner, M. & Lundin, S. MultiQC: summarize analysis  
950 results for multiple tools and samples in a single report. *Bioinformatics* **32**, 3047-  
951 3048, doi:10.1093/bioinformatics/btw354 (2016).
- 952 81 Martin, M. Cutadapt removes adapter sequences from high-throughput sequencing  
953 reads. **17**, 3, doi:10.14806/ej.17.1.200 (2011).
- 954 82 Smith, T., Heger, A. & Sudbery, I. UMI-tools: modeling sequencing errors in Unique  
955 Molecular Identifiers to improve quantification accuracy. *Genome research* **27**, 491-  
956 499, doi:10.1101/gr.209601.116 (2017).
- 957 83 Uren, P. J. *et al.* Site identification in high-throughput RNA-protein interaction data.  
958 *Bioinformatics* **28**, 3013-3020, doi:10.1093/bioinformatics/bts569 (2012).

- 959 84 Li, Q., Brown, J. B., Huang, H. & Bickel, P. J. Measuring reproducibility of high-  
960 throughput experiments. *Ann. Appl. Stat.* **5**, 1752-1779, doi:10.1214/11-AOAS466  
961 (2011).
- 962 85 Huang, H. *et al.* Recognition of RNA N6-methyladenosine by IGF2BP proteins  
963 enhances mRNA stability and translation. *Nature Cell Biology* **20**, 285-295,  
964 doi:10.1038/s41556-018-0045-z (2018).
- 965
- 966

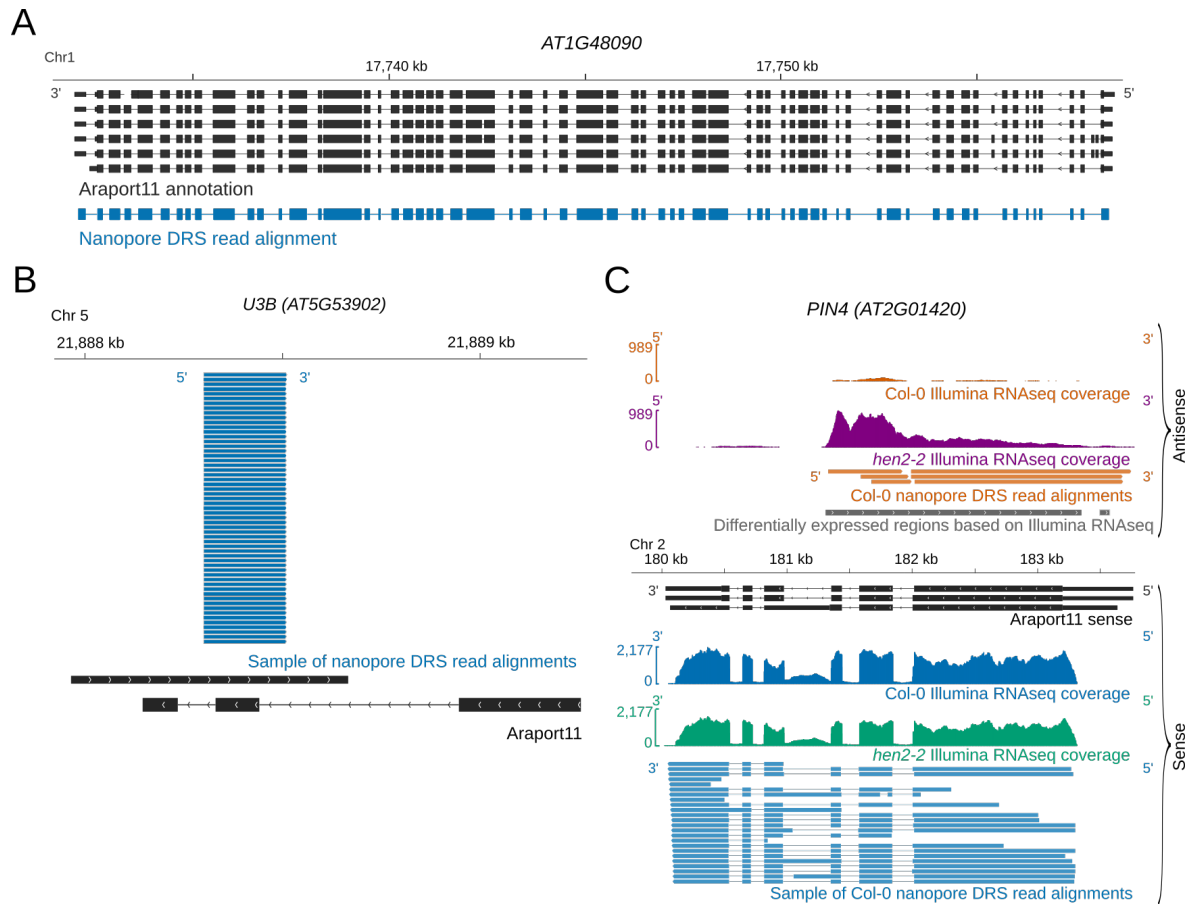

967

968

969

970 **Figure 1. Diverse Arabidopsis RNAs are detected by nanopore DRS.**

971 (A) Nanopore DRS 12.7-kb read alignment at *AT1G48090*, comprising 63 exons. Black, Araport11  
972 annotation; blue, nanopore DRS read alignment.

973 (B) Nanopore DRS read alignments at the snoRNA gene *U3B*. Black, Araport11 annotation; blue,  
974 nanopore DRS read alignments.

975 (C) *PIN4* long non-coding antisense RNAs detected using nanopore DRS. Blue, Col-0 sense Illumina  
976 RNAseq coverage and nanopore sense read alignments; orange, Col-0 antisense Illumina RNAseq  
977 coverage and nanopore antisense read alignments; green, *hen2-2* mutant sense Illumina RNAseq  
978 coverage; purple, *hen2-2* mutant antisense Illumina RNAseq coverage; black, sense RNA isoforms  
979 found in Araport11; grey, antisense differentially expressed regions detected with DERfinder.

980 **[Linked to Supplementary figure 1].**

981

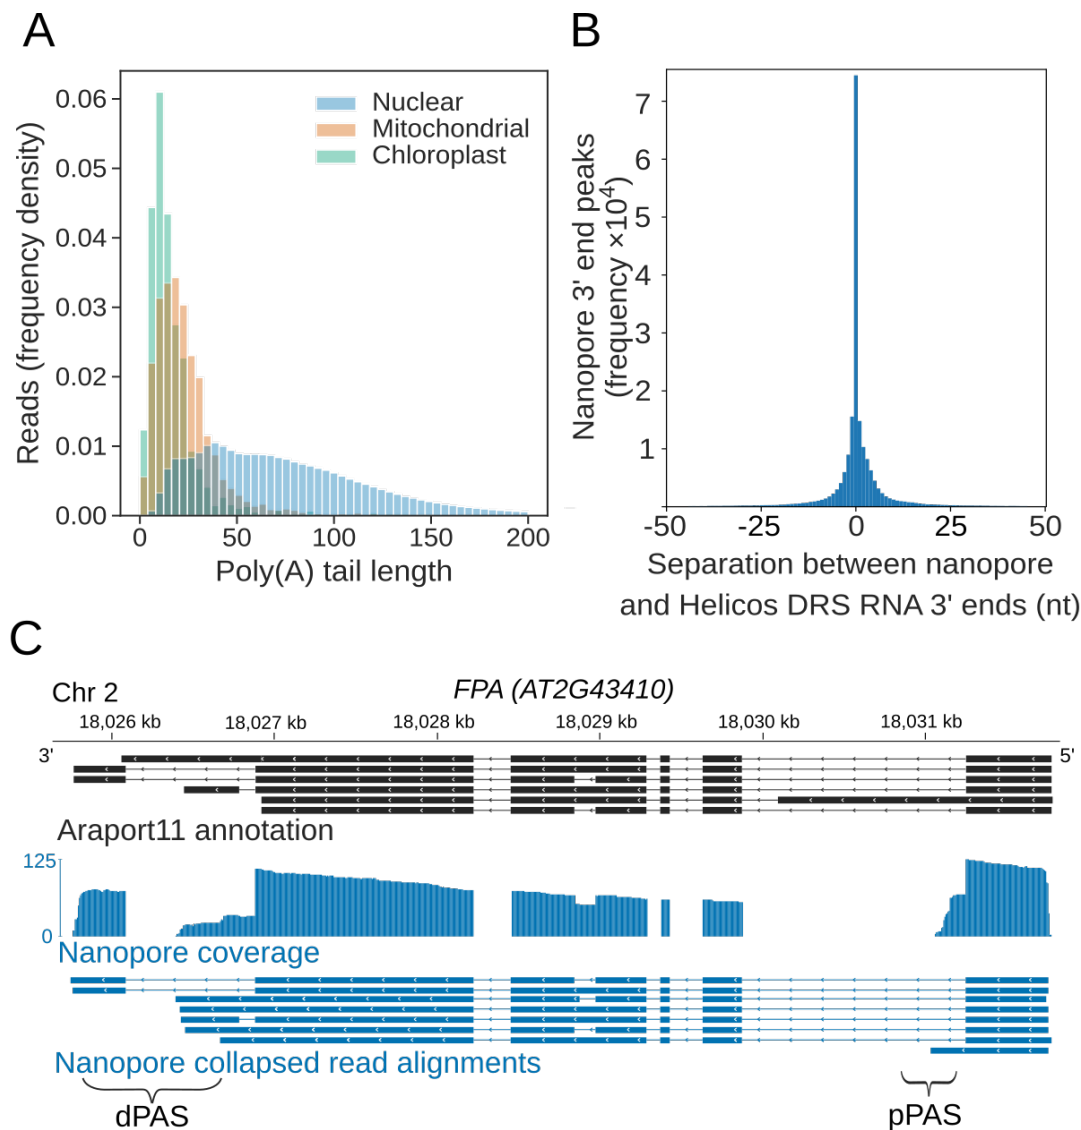

982

983

984

985 **Figure 2. Nanopore DRS reveals poly(A) tail length and maps 3' cleavage and polyadenylation sites.**

986 (A) Normalized histogram showing poly(A) tail length of RNAs encoded by different genomes. Blue, nuclear (n = 2,348,869 reads); orange, mitochondrial (n = 2,490 reads); green, chloroplast (n = 1,848 reads).

989 (B) Distance between the RNA 3' end positions in nanopore DRS read alignments and the nearest polyadenylation sites identified by Helicos data.

991 (C) Nanopore DRS identified 3' polyadenylation sites in RNAs transcribed from *FPA (AT2G43410)*. The blue track shows the coverage of nanopore DRS read alignments and collapsed read alignments representing putative transcript annotations detected by nanopore DRS. Black, isoforms found in Araport11 annotation; blue, read alignments from nanopore DRS. pPAS, proximal polyadenylation site; dPAS, distal polyadenylation sites.

996 **[Linked to Supplementary figure 2].**

997

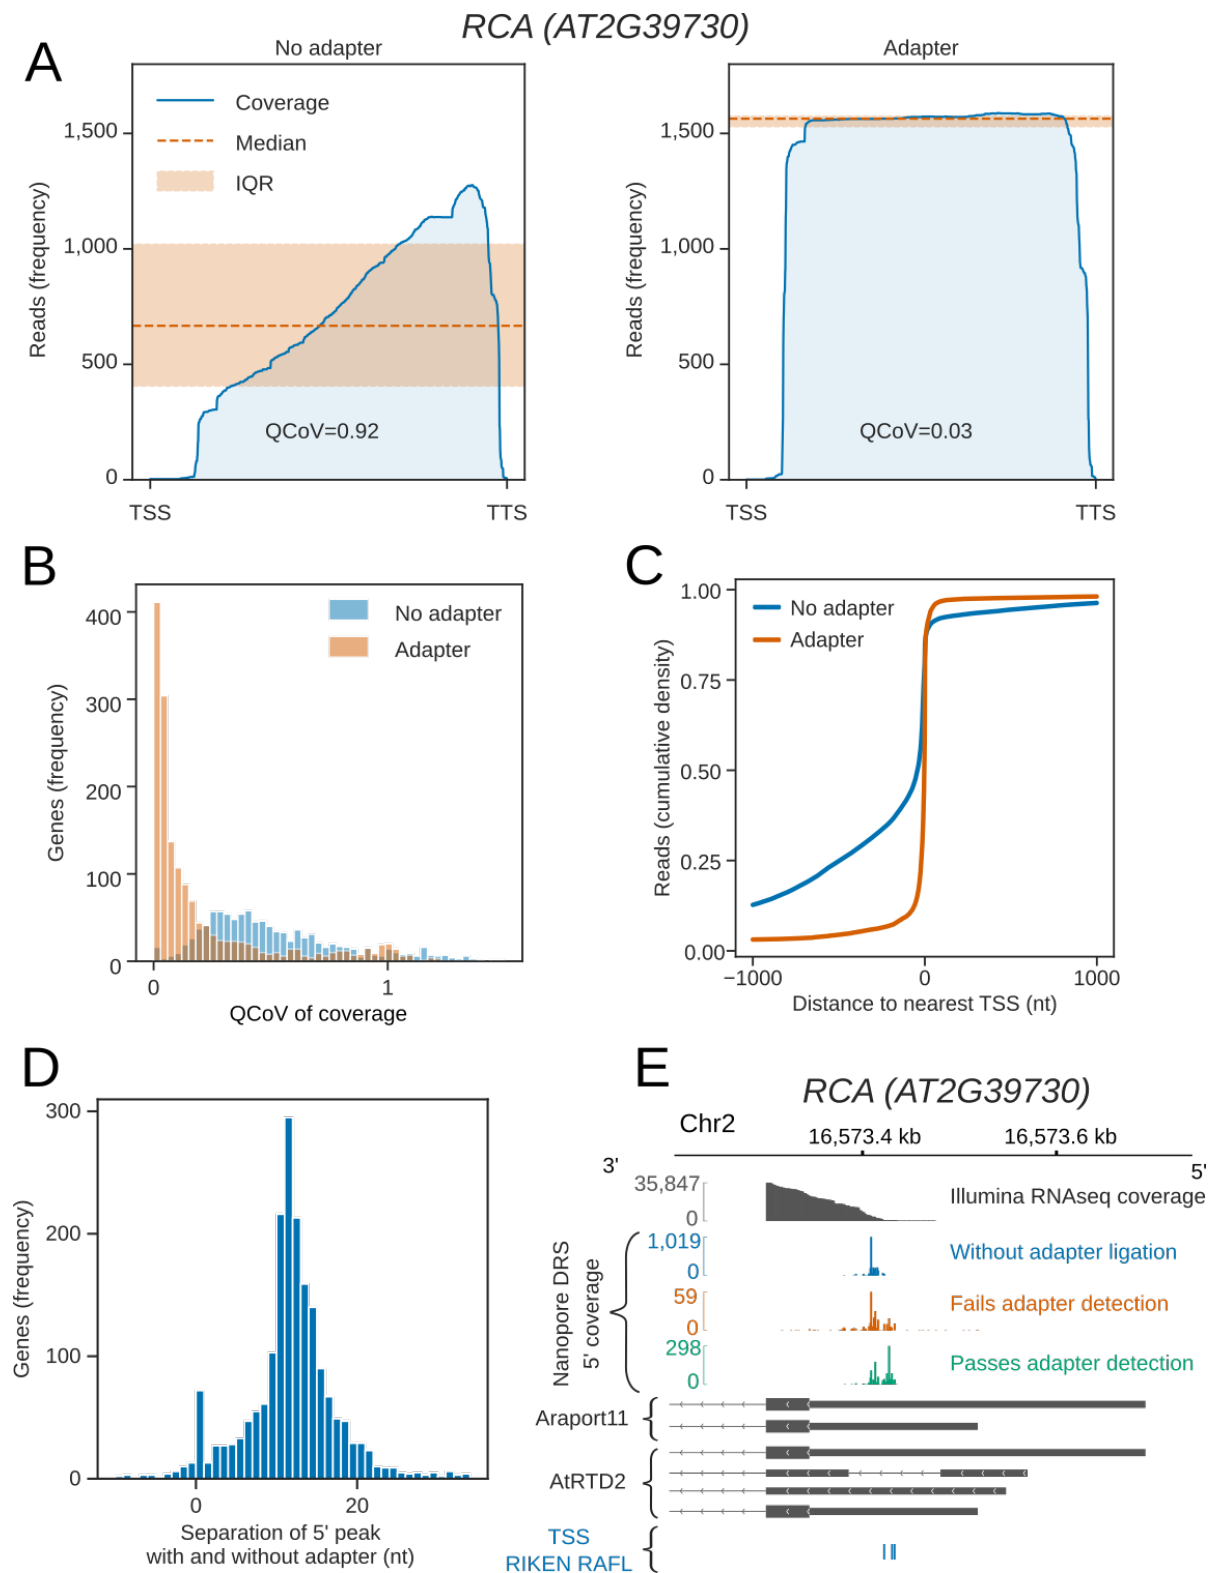

998

999

1000 **Figure 3. Cap-dependent ligation of an adapter enables detection of authentic RNA 5' ends.**

1001 (A) 5' adapter RNA ligation reduces 3' bias in nanopore DRS data at *RCA (AT2G39730)*. Blue line,

1002 exonic read coverage at *RCA* for reads without (left) and with(right) adapter; orange line, median



1003 coverage; orange shaded area, interquartile range (IQR). Change in 3' bias can be measured using  
1004 the IQR / median = quartile coefficient of variation (QCoV). 5' adapter ligation reduces 3' bias at *RCA*  
1005 from 0.92 to 0.03.

1006 **(B)** 5' adapter RNA ligation reduces 3' bias in nanopore DRS data. Histogram showing the QCoV in  
1007 per base coverage for reads with a 5' adapter RNA (orange) compared with reads without a 5'  
1008 adapter RNA (blue).

1009 **(C)** Cap-dependent adapter ligation allows identification of authentic 5' ends using nanopore DRS.  
1010 The cumulative distribution function shows the distance to the nearest Transcription Start Site (TSS)  
1011 identified from full-length transcripts cloned as part of the RIKEN RAFL project for reads with a 5'  
1012 adapter RNA (orange) compared with reads without a 5' adapter RNA (blue).

1013 **(D)** Cap-dependent adapter ligation enabled resolution of an additional 11 nt of sequence at the  
1014 RNA 5' end. Histogram showing the nucleotide shift in the largest peak of 5' coverage for each gene  
1015 in data obtained using protocols with vs without a 5' adapter.

1016 **(E)** For *RCA (AT2G39730)*, the 5' end identified using cap-dependent 5' adapter RNA ligation protocol  
1017 was consistent with Illumina RNAseq and full-length cDNA start site data but differed from the 5'  
1018 ends in the *Araport11* and *AtRTD2* annotations. Upper panel: grey, Illumina RNAseq coverage; blue,  
1019 nanopore DRS 5' end coverage generated without a cap-dependent ligation protocol; green/orange,  
1020 nanopore DRS 5' end coverage for read alignments generated using the cap-dependent ligation  
1021 protocol with (green) and without (orange) 5' adapter RNA. Lower panel: grey, RNA isoforms found  
1022 in *Araport11* and *AtRTD2* annotations; blue, TSSs identified from full-length transcripts cloned as  
1023 part of the RIKEN RAFL project.

1024 **[Linked to Supplementary figure 3].**

1025

1026



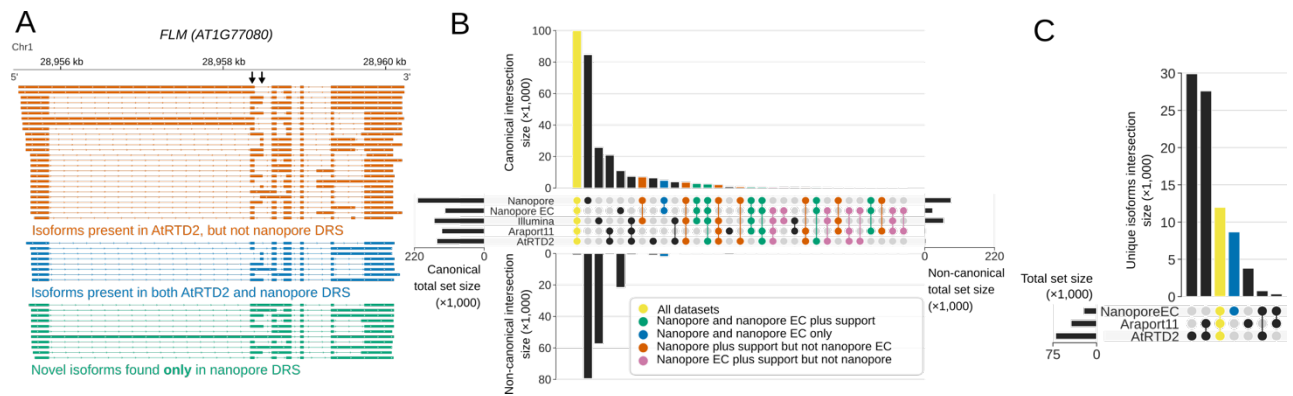

1027

1028

1029 **Figure 4. Nanopore DRS reveals the complexity of alternative splicing.**

1030 **(A)** Nanopore DRS identified the mutually exclusive alternative splicing of *FLOWERING LOCUS M*

1031 (*FLM, AT1G77080*). Black arrows indicate mutually exclusive exons. Novel isoforms were also

1032 identified: orange, isoforms present in the AtRTD2 annotation but not identified using nanopore

1033 DRS; blue, isoforms common to both AtRTD2 and nanopore DRS; green, novel isoforms identified in

1034 nanopore DRS.

1035 **(B)** Comparison of splicing events identified in error-corrected and non-error-corrected nanopore

1036 DRS, Illumina RNA sequencing, and Araport11 and AtRTD2 annotations. Bar size represents the

1037 number of unique splicing events common to the set intersection highlighted using circles (see

1038 Supplementary table 3 for the exact values). GU/AG splicing events are shown on the top and non-

1039 GU/AG on the bottom of the plot: yellow, splicing events common to all five datasets; green, events

1040 common to both error-corrected and non-error-corrected nanopore DRS with support in orthogonal

1041 datasets; blue, events common to both nanopore DRS datasets without orthogonal support; orange,

1042 events found in uncorrected nanopore DRS (but not error corrected) with orthogonal support; pink,

1043 events found in error-corrected nanopore DRS (but not uncorrected) with orthogonal support.

1044 **(C)** Comparison of RNA isoforms (defined as sets of co-spliced introns) identified in error-corrected

1045 full-length nanopore DRS, Araport11 and AtRTD2 annotations. Bar size represents the number of

1046 splicing events common to a group highlighted using circles below (see Supplementary table 3 for

1047 the exact values): yellow, unique splicing patterns nanopore DRS and both reference annotations;

1048 blue, novel isoforms.

1049 **[Linked to Supplementary figure 4].**

1050

1051

1052

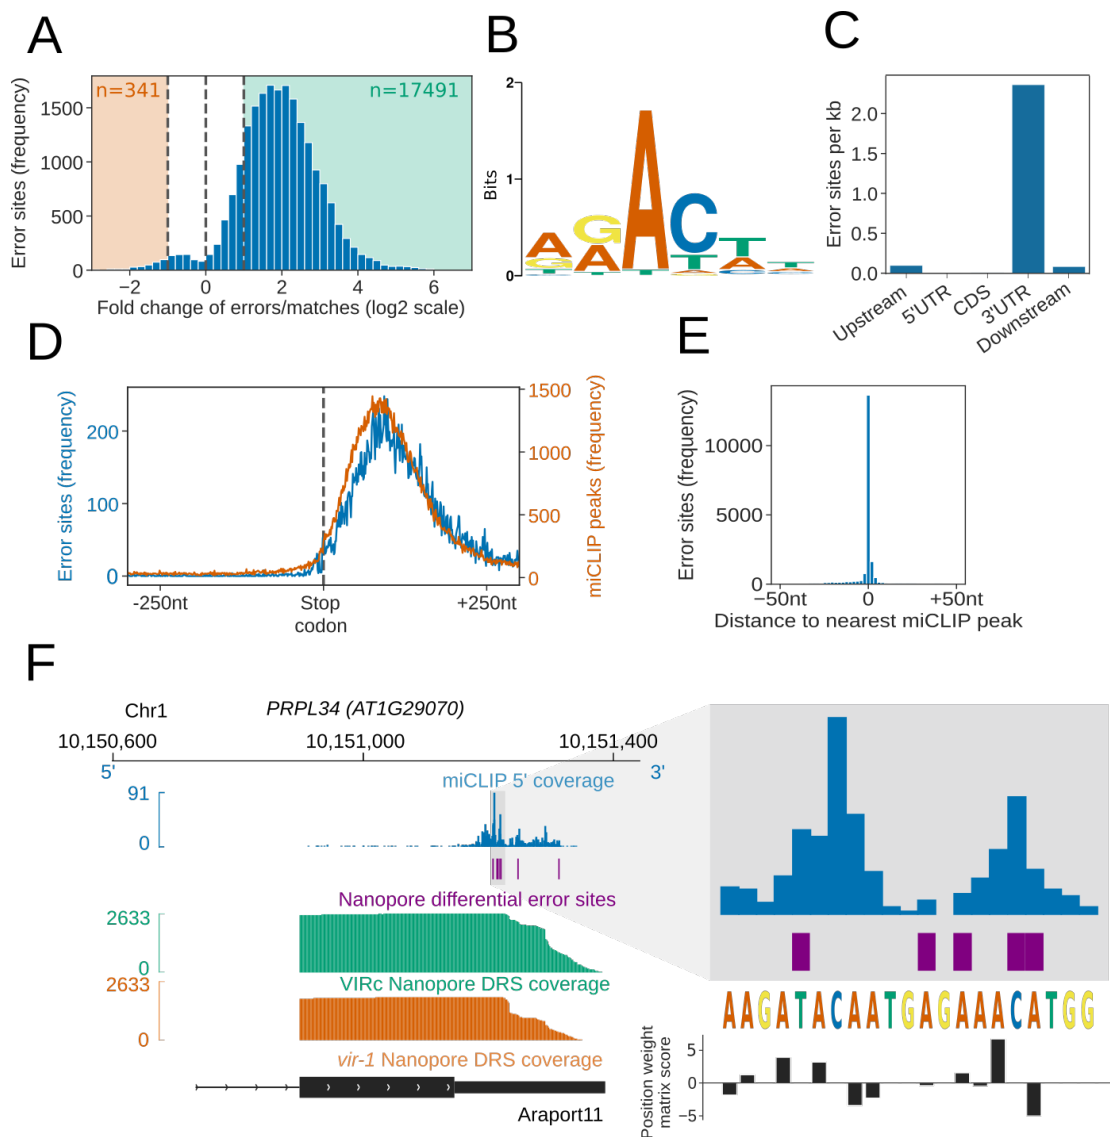

1053

1054

1055 **Figure 5. Differential error rate analysis identifies sites of VIR-dependent m<sup>6</sup>A modifications**  
 1056 **transcriptome-wide.**

1057 (A) Loss of VIR function is associated with reduced error rate in nanopore DRS. Histogram showing  
 1058 the log<sub>2</sub> fold change in the ratio of errors to reference matches at bases with a significant change in  
 1059 error profile in *vir-1* mutant compared with the VIR-complemented line. Orange and green shaded  
 1060 regions indicate sites with increased and reduced errors in *vir-1*, respectively.

1061 (B) The motif at error rate sites matches the consensus m<sup>6</sup>A target sequence. The sequence logo is  
 1062 for the motif enriched at sites with reduced error rate in the *vir-1* mutant.

1063 (C) Differential error rate sites are primarily found in 3' UTRs. Bar plot showing the number of  
 1064 differential error rate sites per kb for different genic feature types of 48,149 protein coding  
 1065 transcript loci in the nuclear genome of the Araport11 reference. Upstream and downstream regions  
 1066 were defined as 200 nt regions 5' and 3' of the annotated transcription termination sites,  
 1067 respectively.

1068 (D) Differential error rate sites and miCLIP peaks are similarly distributed within the 3' UTR, without  
1069 accumulation at the stop codon. Metagene plot centred on stop codons from 48,149 protein coding  
1070 transcript loci, showing the frequency of nanopore DRS error sites (blue) and miCLIP peaks (orange).  
1071 (E) The locations of differential error rate sites are in good agreement with the locations of miCLIP  
1072 sites. Histogram showing the distribution of distances to the nearest miCLIP peak for each site of  
1073 reduced error. Most error sites (77%) are within 5 nt of a miCLIP peak.  
1074 (F) Nanopore DRS differential error site analysis and miCLIP identify m<sup>6</sup>A sites in the 3' UTR of  
1075 *PRPL34* RNA. Blue, miCLIP 5' end coverage; purple, nanopore DRS differential error sites; green,  
1076 nanopore DRS coverage of VIR-complemented line (VIRc); orange, nanopore DRS coverage of *vir-1*  
1077 mutant; black, RNA isoform from Araport11 annotation. The expanded region shows miCLIP  
1078 coverage (blue) and error sites (purple) scored using the m<sup>6</sup>A consensus position weight matrix  
1079 (black; Figure 5B). A higher positive score denotes a higher likelihood of a match to the consensus  
1080 sequence.  
1081 **[Linked to Supplementary figure 5].**  
1082  
1083

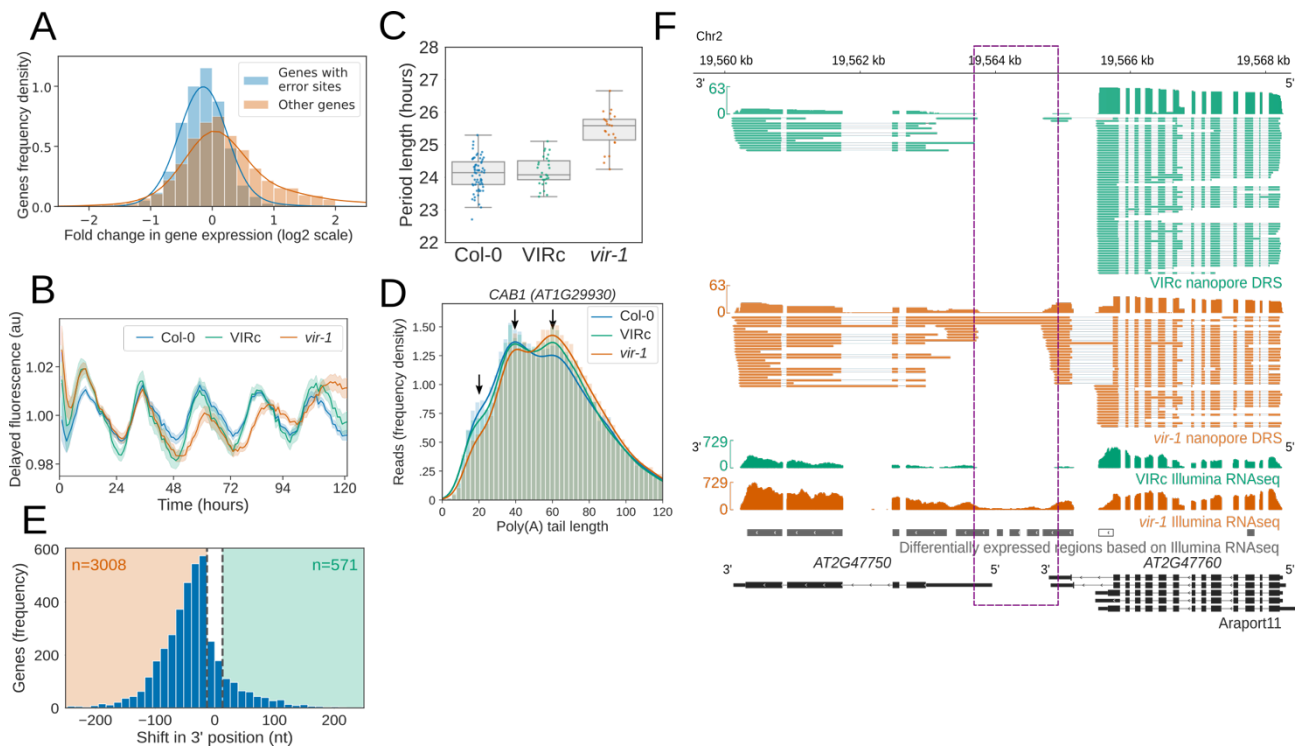

1084

1085

1086

1087 **Figure 6. Reduction in m<sup>6</sup>A RNA modification leads to disruption of the circadian clock and**  
 1088 **generation of chimeric RNAs.**

1089 (A) Genes with differential error rate sites have lower detectable RNA levels. Histogram showing the  
 1090 log<sub>2</sub> fold change in protein coding gene expression based on counts from nanopore DRS reads in the  
 1091 *vir-1* mutant compared to the VIR-complemented line. Blue, genes with differential error rate sites  
 1092 ( $n = 5,157$  genes); orange, genes with without differential error rate sites ( $n=14,601$  genes).

1093 (B) The circadian period is lengthened in the *vir-1* mutant. Mean delayed fluorescence  
 1094 measurements in arbitrary units are shown for Col-0 (blue;  $n = 61$  technical reps), the VIR-  
 1095 complemented line (VIRc; green;  $n = 29$  technical reps) and the *vir-1* mutant (orange;  $n = 24$   
 1096 technical reps). Shaded areas show bootstrapped 95% confidence intervals for the mean.

1097 (C) Boxplot showing the period lengths for Col-0 (blue), VIRc (green) and the *vir-1* mutant (orange),  
 1098 calculated from delayed fluorescence measurements shown in (B).

1099 (D) Poly(A) tail length is altered in the *vir-1* mutant. Histogram showing the poly(A) tail length  
 1100 distribution of *CAB1* (*AT1G29930*) in Col-0 (blue;  $n=40,841$  reads), VIRc (green;  $n=65,810$  reads) and  
 1101 the *vir-1* mutant (orange;  $n=68,068$  reads). Arrows indicate phased peaks of poly(A) length at  
 1102 approximately 20, 40 and 60 nt. *vir-1* distribution is significantly different from both Col-0 and VIRc,  
 1103 according to the Kolmogorov–Smirnov test ( $p=1.3 \times 10^{-76}$ ,  $p=4.7 \times 10^{-49}$  respectively).

1104 (E) Global change in 3' end usage in the *vir-1* mutant compared with the VIRc line. Histogram  
 1105 showing the distance in nucleotides between the most reduced and most increased 3' end positions  
 1106 for genes in which the 3' end profile is altered in *vir-1* (detected with the Kolmogorov–Smirnov test,  
 1107 FDR < 0.05). A threshold of 13 nt was used to detect changes in the 3' end position.

1108 (F) Readthrough events and chimeric RNAs are detected in *vir-1*. Green, nanopore DRS and Illumina  
 1109 RNAseq data for the VIRc line; orange, nanopore DRS and Illumina RNAseq data for the *vir-1* mutant;

1110 black, RNA isoforms found in Araport11 annotation. Differentially expressed regions between *vir-1*  
1111 and VIRc detected using Illumina RNAseq data with DERfinder are shown in grey (for upregulated  
1112 regions) or white (for downregulated regions). Intergenic readthrough regions are highlighted by the  
1113 purple dashed rectangle.

1114 **[Linked to Supplementary figure 6].**

1115

1116

1117

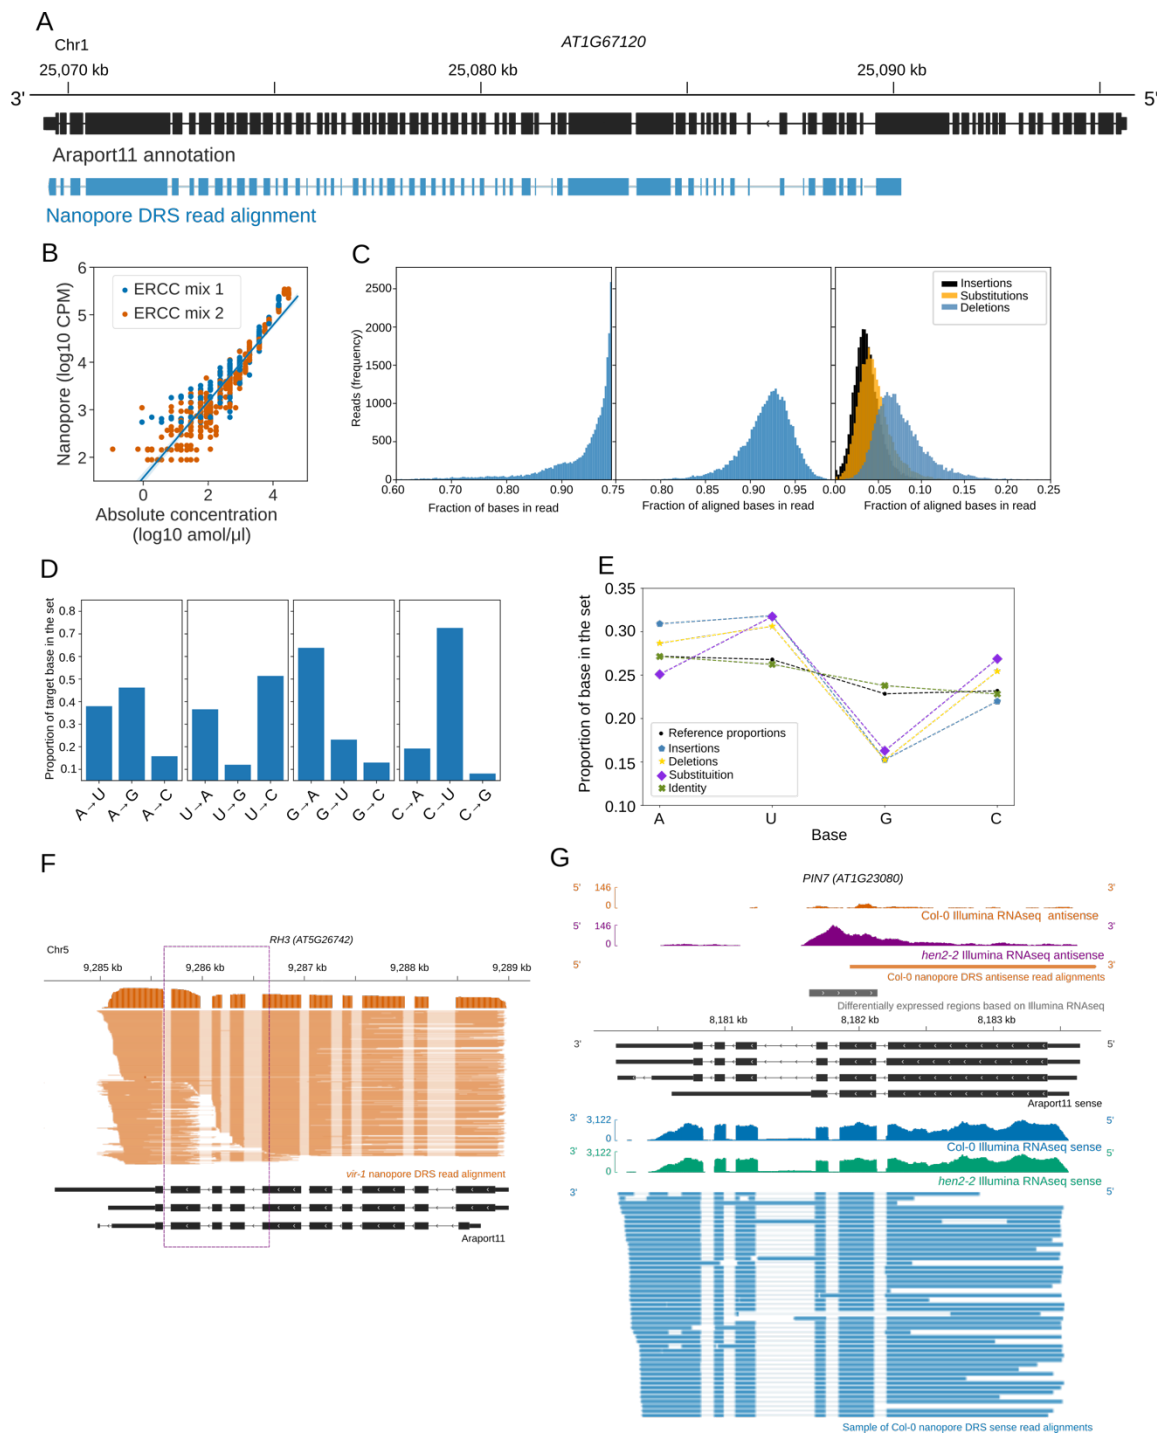

1118

1119

1120 **Supplementary figure 1. Properties of nanopore DRS sequencing data.**

1121 (A) Nanopore DRS identified a 12.8 kb transcript generated from the *AT1G67120* gene that includes  
 1122 58 exons. Black, RNA isoform present in the Araport11 annotation; blue, an RNA isoform identified  
 1123 using nanopore DRS.

1124 (B) Synthetic ERCC RNA Spike-In mixes are detected in a quantitative manner. Absolute  
1125 concentrations of spike-ins are plotted against counts per million (CPM) reads in log<sub>10</sub> scale. Blue,  
1126 ERCC RNA Spike-In mix 1; orange, ERCC RNA Spike-In mix 2.

1127 (C) Overview of the sequencing and alignment characteristics of nanopore DRS data for ERCC RNA  
1128 Spike-Ins. Left, distribution of the length fraction of each sequenced read that aligns to the ERCC  
1129 RNA Spike-In reference; centre, distribution of fraction of identity that matches between the  
1130 sequence of the read and the ERCC RNA Spike-In reference for the aligned portion of each read;  
1131 right, distributions of the occurrence of insertions (black), substitutions (orange) and deletions (blue)  
1132 as a proportion of the number of aligned bases in each read.

1133 (D) Substitution preference for each nucleotide (left to right: adenine [A], uracil [U], guanine [G],  
1134 cytosine [C]). When substituted, G is replaced with A in more than 63% of its substitutions, while C is  
1135 replaced by U in 73%. Conversely, U is rarely replaced with G (12%) and A is rarely substituted with C  
1136 (16%).

1137 (E) Nucleotide representation within the ERCC RNA Spike-In reference sequences (black dots)  
1138 compared with nucleotide representation within four categories from the nanopore DRS reads.  
1139 Identity matches between the sequence of the read and the ERCC RNA Spike-In reference (green  
1140 crosses), insertions (blue pentagons), deletions (yellow stars) and substitutions (purple diamonds). G  
1141 is under-represented and U is over-represented for all three categories of error (insertion, deletion  
1142 and substitution) relative to the reference nucleotide distribution. C is over-represented in deletions  
1143 and substitutions. A is over-represented in insertions and deletions and under-represented in  
1144 substitutions.

1145 (F) Signals originating from the *RH3* transcripts are susceptible to systematic over-splitting around  
1146 exons 7–9 (highlighted using a purple dashed box), resulting in reads with apparently novel 5' or 3'  
1147 positions. This appears only to occur at high frequency in datasets collected after May 2018  
1148 (Supplementary table 1) and may result from an update to the MinKNOW software.

1149 (G) *PIN7* long non-coding antisense RNAs detected using nanopore DRS. Blue, Col-0 sense Illumina  
1150 RNAseq coverage and nanopore sense read alignments; orange, Col-0 antisense Illumina RNAseq  
1151 coverage and nanopore antisense read alignments; green, *hen2-2* mutant sense Illumina RNAseq  
1152 coverage; purple, *hen2-2* mutant antisense Illumina RNAseq coverage; black, sense RNA isoforms  
1153 found in Araport11 annotation; grey, antisense differentially expressed regions detected with  
1154 DERfinder.

1155 **[Linked to Figure 1]**  
1156

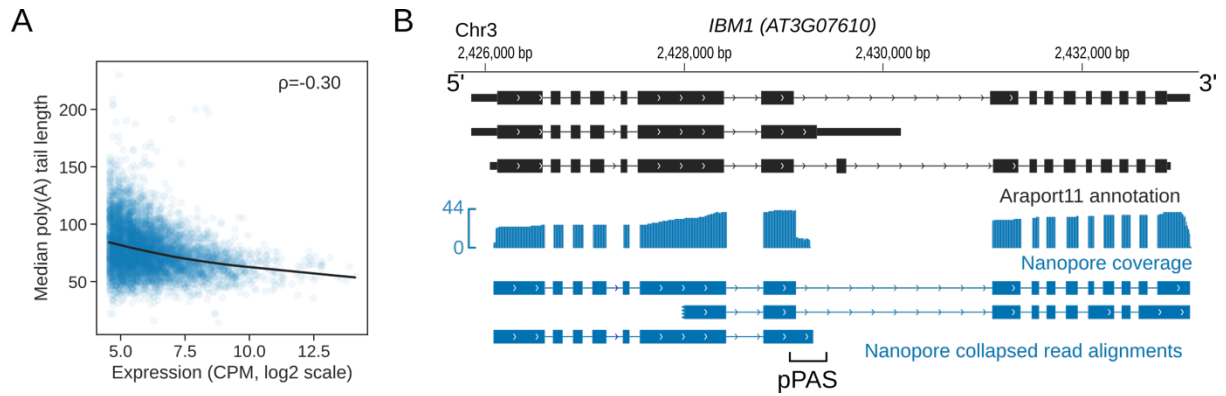

1157

1158

1159 **Supplementary figure 2. 3' end processing is revealed by nanopore DRS.**

1160 (A) The RNA poly(A) tail length negatively correlates with the gene expression level. Expression in  
1161 log2 scale of counts per million (CPM) obtained from nanopore DRS data is plotted against the  
1162 median poly(A) tail length.  $\rho$ , Spearman's correlation coefficient; black line, locally weighted  
1163 scatterplot smoothing (LOWESS) regression fit.

1164 (B) Nanopore DRS identified 3' polyadenylation sites in RNAs transcribed from the *IBM1*  
1165 (*AT3G07610*) gene. The blue track shows the coverage of nanopore DRS reads. Black, isoforms found  
1166 in Araport11 annotation; blue, isoforms those detected by nanopore DRS. pPAS, proximal  
1167 polyadenylation site.

1168 **[Linked to Figure 2].**

1169



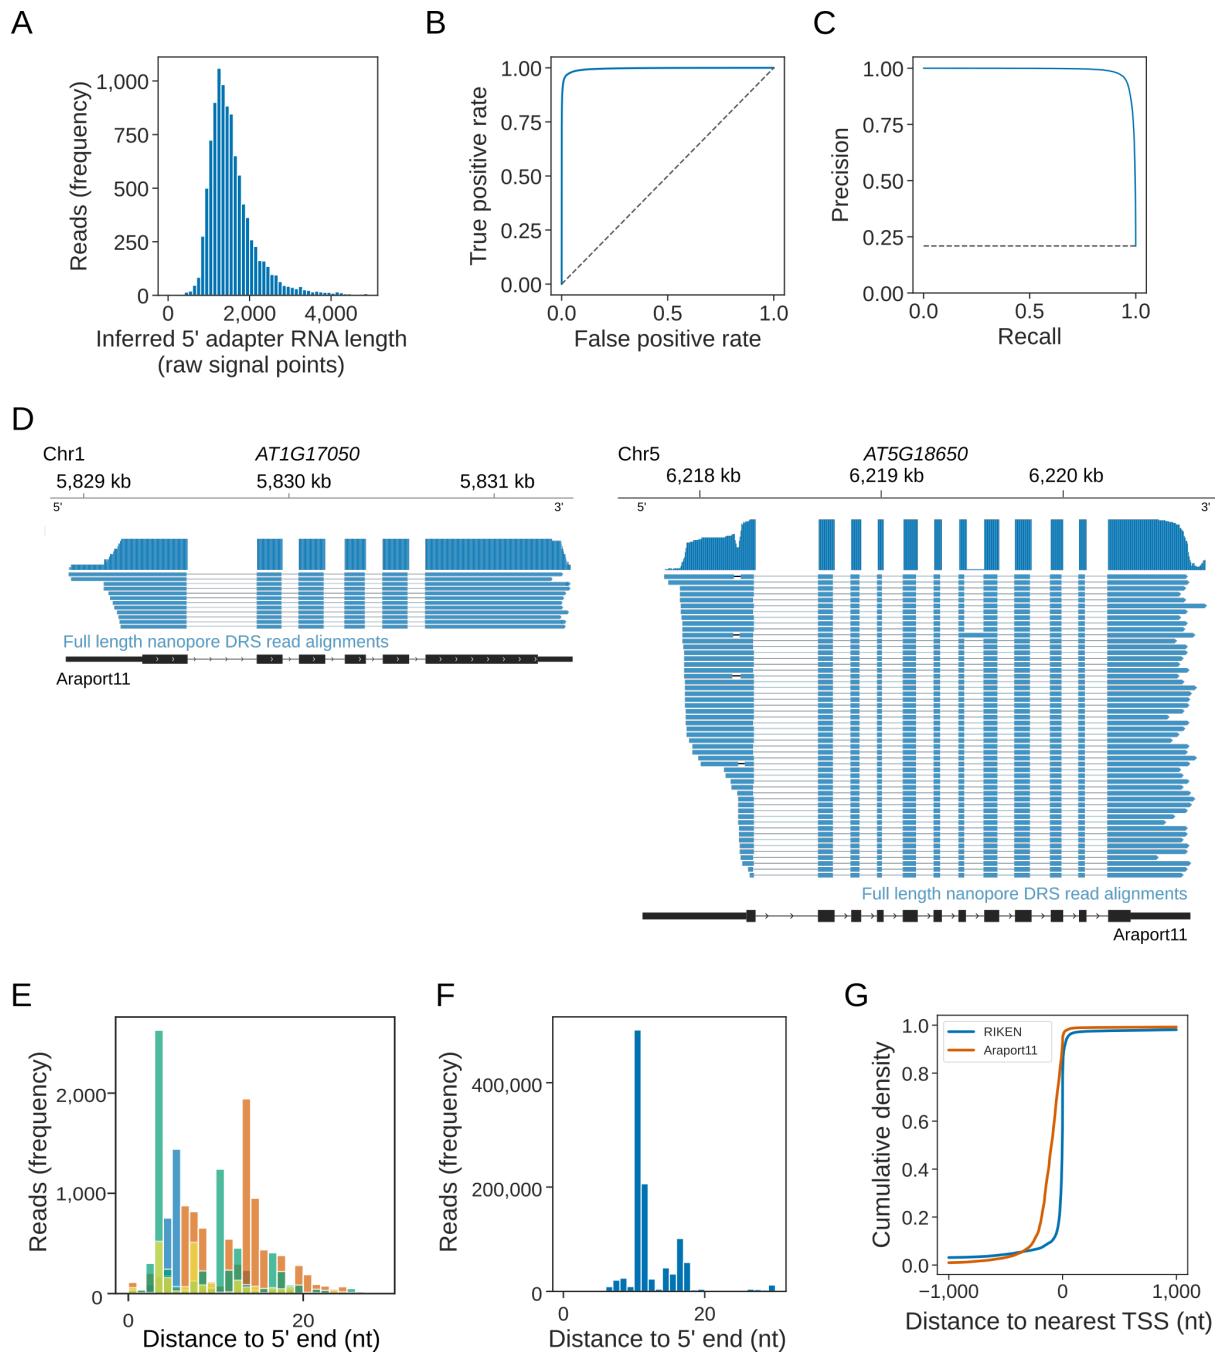

1170

1171

1172 **Supplementary figure 3. Nanopore DRS with cap-dependent ligation of 5' adapter RNA.**

1173 (A) Histogram showing the distribution of 5' adapter RNA length in the nanopore raw current signal,

1174 as inferred from alignment of the mRNA sequence to the signal using nanopolish eventalign. The

1175 median signal length was 1,441 points and 96% of adapter signals were 3,000 points or less.

1176 (B) Out-of-bag receiver operator characteristic curve showing the performance of the trained

1177 convolutional neural network at detecting 5' adapter RNA using 3,000 points of signal. The curve

1178 was generated using five-fold cross validation.

1179 (C) Out-of-bag precision recall curve showing the performance of trained neural network, generated

1180 using five-fold cross validation.

1181 (D) Alternative transcription start sites were identified using nanopore DRS with cap-dependent  
1182 ligation of a 5' end adapter at the *AT1G17050* and *AT5G18650* genes. The blue track shows the  
1183 coverage of nanopore DRS reads. Black, isoforms found in the Araport11 annotation; blue, isoforms  
1184 detected by nanopore DRS with cap-dependent ligation of 5' adapter RNA.

1185 (E) Reads mapping to ERCC RNA Spike-Ins lack approximately 11 nt of sequence at the 5' end.  
1186 Histogram showing the distance to the 5' end for ERCC RNA Spike-In reads (each spike-in is shown in  
1187 a different colour; only those with >1,000 supporting reads are shown).

1188 (F) Reads mapping to *in vitro* transcribed mGFP lack approximately 11 nt of sequence at the 5' end.  
1189 Histogram showing the distance to the 5' end for *in vitro* transcribed mGFP.

1190 (G) Araport11 annotation overestimates the length of 5' UTRs. The cumulative distribution function  
1191 shows the distance to the nearest TSS identified from full-length transcripts cloned as part of the  
1192 RIKEN RAFL project (blue) and Araport11 annotation (orange).

1193 **[Linked to Figure 3].**

1194

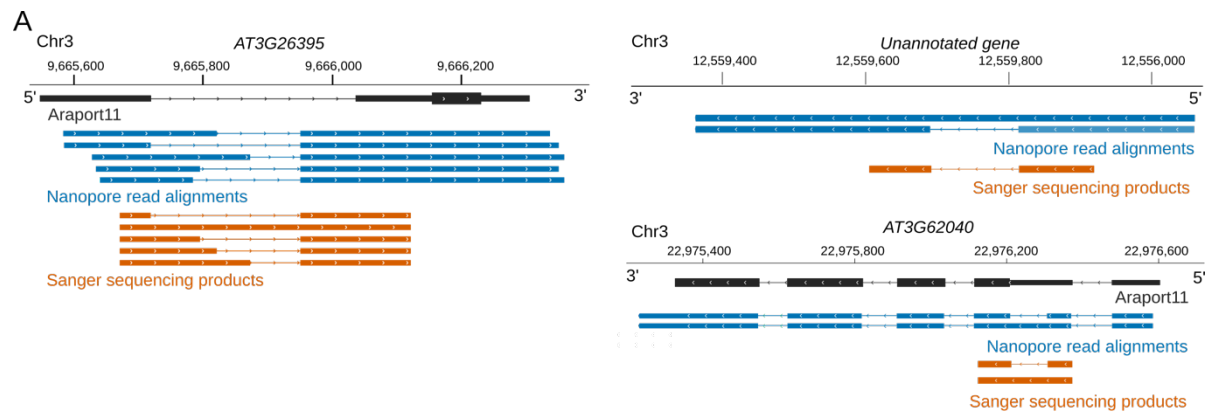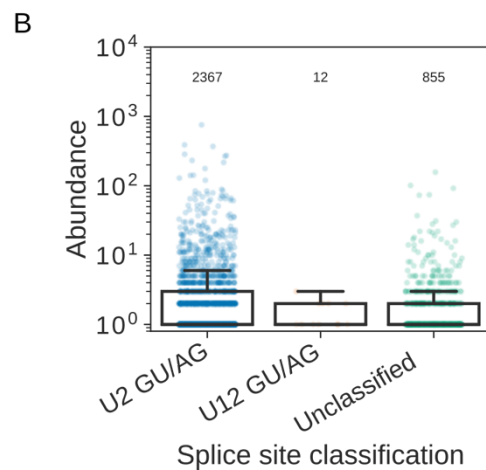

1195

1196

1197 **Supplementary figure 4. Patterns of splicing revealed using nanopore DRS.**

1198 (A) Nanopore DRS can be validated using RT-PCR. Five of the top 20 most highly expressed RNAs  
1199 with novel splice sites were selected; of these, three were validated by RT-PCR followed by Sanger  
1200 sequencing of the DNA products. Black, RNA isoforms present in the Araport11 annotation; blue,  
1201 RNA isoforms found using nanopore DRS; orange, Sanger sequencing products obtained using RT-  
1202 PCR.

1203 (B) Splice junction classification of unannotated GU/AG splice sites found in error-corrected  
1204 nanopore DRS data that also have Illumina support. Counts are plotted in log10 scale and the exact  
1205 number of splice junctions in each set is indicated.

1206 **[Linked to Figure 4].**

1207

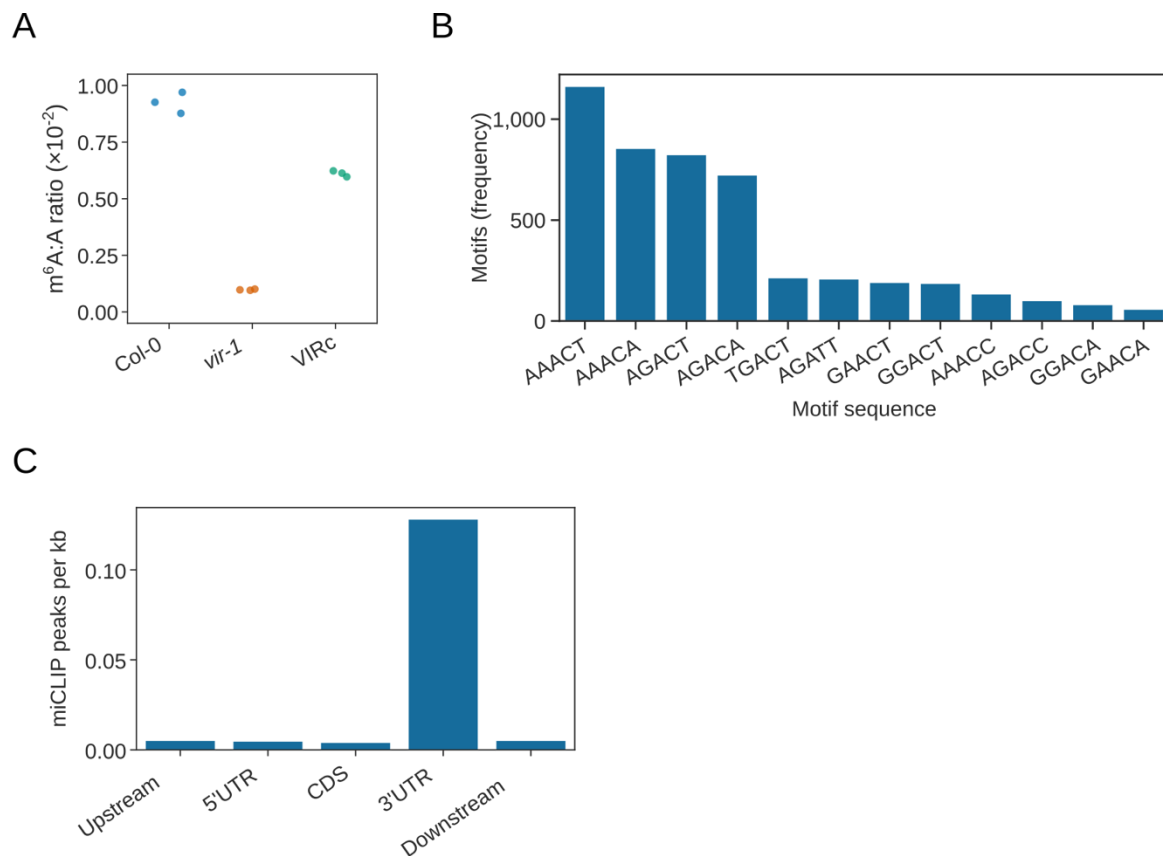

1208

1209

1210 **Supplementary figure 5. Identification of VIR-dependent m<sup>6</sup>A transcriptome-wide.**

1211 (A) *vir-1* shows reduced levels of m<sup>6</sup>A compared with Col-0 and restored m<sup>6</sup>A levels in the VIR-  
1212 complemented line (VIRc). The ratio of m<sup>6</sup>A/A obtained using LC-MS analysis is shown Col-0 (blue),  
1213 *vir-1* (orange) and VIRc (green).

1214 (B) Frequency of m<sup>6</sup>A motifs detected at *vir-1* reduced error sites, as detected by FIMO using the  
1215 motif detected *de novo* by MEME and an FDR threshold of 0.1.

1216 (C) Bar plot showing the number of miCLIP peaks per kb of different genic feature types in the  
1217 Araport11 reference. Upstream and downstream regions were defined as 200 nt regions before and  
1218 after the annotated transcription termination sites, respectively.

1219 **[Linked to Figure 5].**

1220

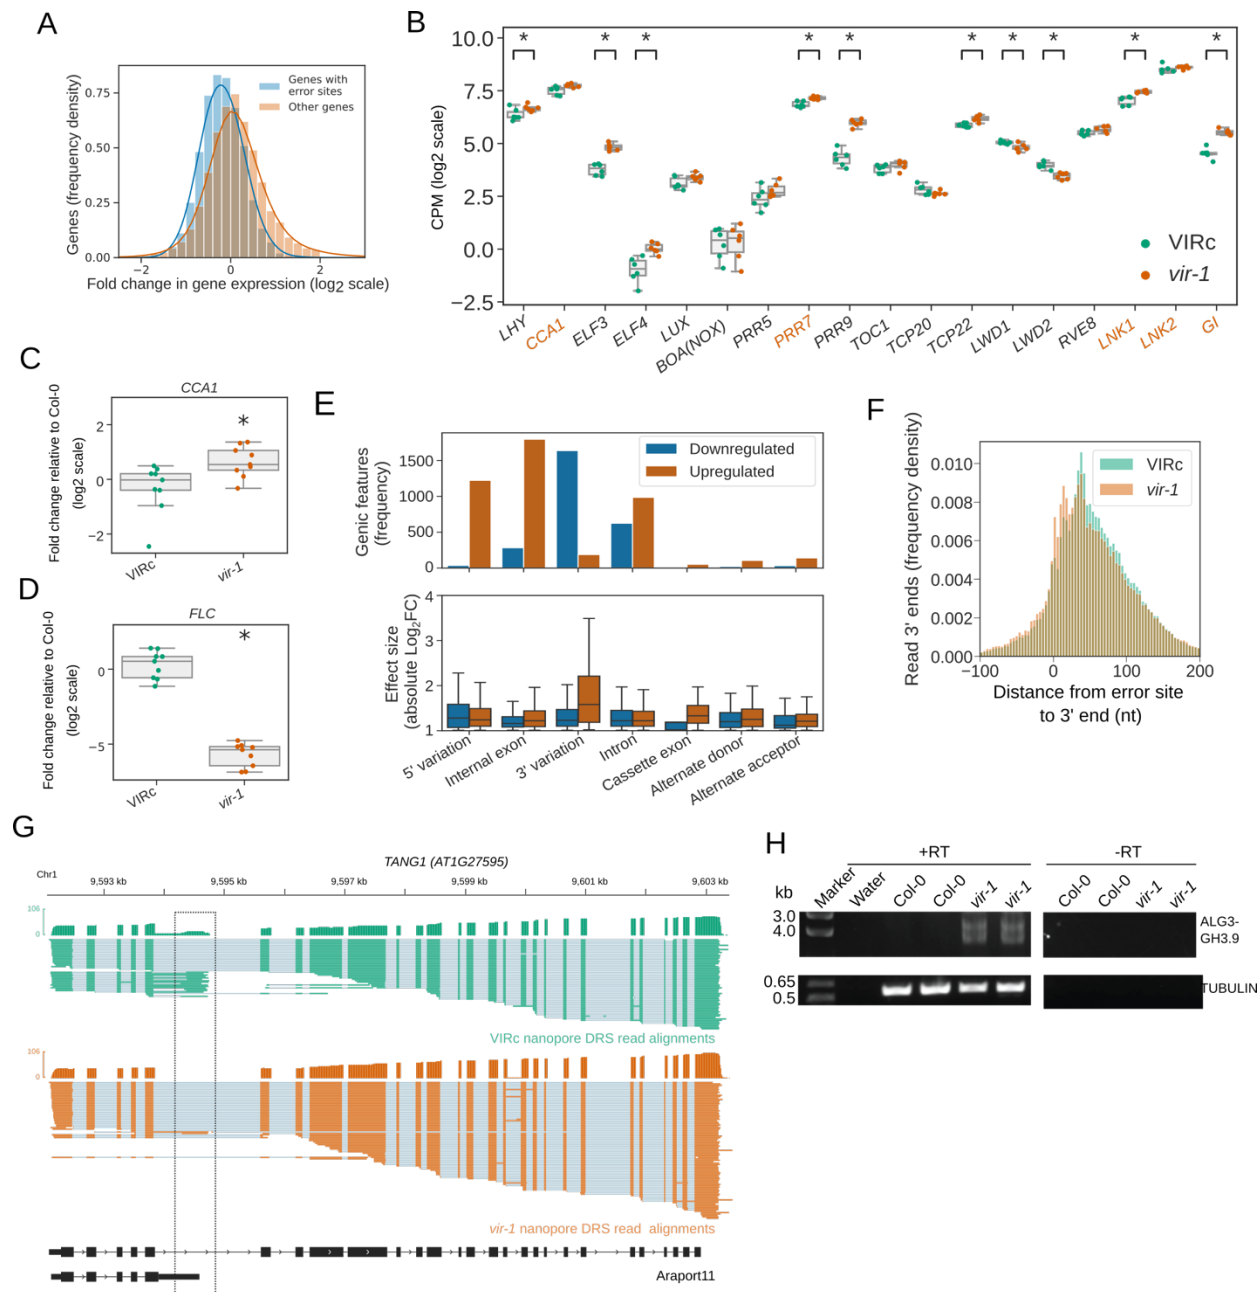

1221

1222 **Supplementary figure 6. Changes in the gene expression of circadian clock components and in RNA**  
 1223 **3' end formation in the *vir-1* mutant.**

1224 (A) Histogram showing log<sub>2</sub> fold changes in gene expression based on Illumina RNAseq data for the  
 1225 *vir-1* mutant and VIR-complemented line. Blue, genes with differential error rate sites (n=5,169  
 1226 genes); orange, genes without differential error rate sites (n=14,612 genes).

1227 (B) Expression of core circadian clock components is perturbed in the *vir-1* mutant. Boxplots showing  
 1228 normalized gene expression measured using Illumina RNAseq in log<sub>2</sub> counts per million (CPM):  
 1229 green, the VIR-complemented line (VIRc); orange, the *vir-1* mutant. Each scatter point represents a  
 1230 single biological replicate. Asterisks denote significant expression changes (using an FDR threshold of  
 1231 0.05). Orange labelled genes have 3' UTR m<sup>6</sup>A detectable by nanopore DRS and miCLIP.

1232 (C) Expression of *CCA1*, encoding a regulator of the circadian rhythm in Arabidopsis, is increased in  
 1233 the *vir-1* mutant. Boxplot showing the gene expression change from Col-0 (measured by RT-qPCR)

1234 for VIRc (green) and *vir-1* (orange). Three technical replicates of three biological replicates were  
1235 conducted. Each scatter point represents the comparison of a technical replicate of treatment (VIRc  
1236 or *vir-1*) against control (Col-0). The expression change in *vir-1* is significant ( $p=0.02$ ).  
1237 (D) Expression of the *Flowering Locus C (FLC)* gene is decreased in the *vir-1* mutant. Boxplot showing  
1238 gene expression change from Col-0 (measured by RT-qPCR) for VIRc (green) and *vir-1* (orange). Three  
1239 technical replicates of three biological replicates were conducted. Each scatter point represents the  
1240 comparison of a technical replicate of treatment (VIRc or *vir-1*) against control (Col-0). Expression  
1241 change in *vir-1* is significant ( $p=2.4\times 10^{-14}$ ).  
1242 (E) Splicing is moderately disrupted in the *vir-1* mutant. Results of differential exon usage analysis  
1243 with DEXseq are shown for contiguous regions (“exon chunks”), which occur in the same sets of  
1244 transcripts in the Araport11 reference. Regions were classified as a 5’ or 3’ variation if they were  
1245 bounded by the TSS of one or more transcripts. Orange, features with increased usage; blue,  
1246 features with reduced usage. Boxplots show the distribution in absolute log2 fold change for each  
1247 feature set.  
1248 (F) A shift to the use of more proximal polyadenylation sites is observed in m<sup>6</sup>A containing  
1249 transcripts in the *vir-1* mutant. Histogram showing distance from the error site (n=17,491 error sites)  
1250 to upstream and downstream 3’ ends in the *vir-1* mutant (orange) and VIRc (green).  
1251 (G) *vir-1* mutants exhibit increased readthrough of an intronic proximal poly(A) site in intron 5 of the  
1252 Symplekin domain encoding gene *TANG1*. green, nanopore DRS reads from VIRc; orange, nanopore  
1253 DRS reads from the *vir-1* mutant; black, Araport11 annotation. The dashed black box highlights the  
1254 site of proximal polyadenylation.  
1255 (H) *ALG3-GH3.9* chimeric RNAs are generated in the *vir-1* mutant. RT-PCR gel showing formation of  
1256 chimeric RNAs in the *vir-1* mutant compared with Col-0.  
1257 **[Linked to Figure 6].**  
1258

| Sequencing date | Genotype | Bio replicates | Adapter ligation | Total reads basecalled | Reads mapped to ERCC spike-ins | Reads mapped to TAIR10 | Longest read mapped to ERCC spike-ins | Median length of reads mapped to ERCC spike-ins | Longest read mapped to TAIR10 | Median length of reads mapped to TAIR10 | Percentage mapped to TAIR10 | Estimated over-splitting rate (%) |
|-----------------|----------|----------------|------------------|------------------------|--------------------------------|------------------------|---------------------------------------|-------------------------------------------------|-------------------------------|-----------------------------------------|-----------------------------|-----------------------------------|
| 01/02/2018      | Col-0    | 1              | -                | 1,647,484              | 6756                           | 1,003,137              | 1,905                                 | 481                                             | 12,607                        | 865                                     | 60.89                       | 0.047                             |
| 27/02/2018      | vir-1    | 1              | -                | 1,431,457              | 1074                           | 1,005,664              | 2,304                                 | 492                                             | 12,446                        | 878                                     | 70.25                       | 0.045                             |
| 01/03/2018      | VIRc     | 1              | -                | 1,393,351              | 713                            | 1,101,368              | 1,108                                 | 493                                             | 11,994                        | 873                                     | 79.04                       | 0.111                             |
| 05/04/2018      | Col-0    | 2              | -                | 966,529                | 556                            | 743,684                | 1,099                                 | 492                                             | 11,852                        | 878                                     | 76.94                       | 0.035                             |
| 11/04/2018      | Col-0    | 1              | +                | 1,365,809              | 7005                           | 345,799                | 1,928                                 | 486                                             | 5,663                         | 737                                     | 25.32                       | 0.047                             |
| 13/04/2018      | Col-0    | 2              | -                | 1,242,616              | 701                            | 930,629                | 1,094                                 | 488                                             | 11,434                        | 858                                     | 74.89                       | 0.040                             |
| 16/04/2018      | Col-0    | 3              | -                | 1,079,578              | 907                            | 757,028                | 1,772                                 | 486                                             | 12,744                        | 840                                     | 70.12                       | 0.019                             |
| 18/04/2018      | Col-0    | 4              | -                | 1,007,278              | 525                            | 765,322                | 1,292                                 | 495                                             | 11,542                        | 840                                     | 75.98                       | 0.019                             |
| 08/05/2018      | Col-0    | 2              | +                | 2,043,751              | 11324                          | 557,949                | 2,308                                 | 507                                             | 5,596                         | 732                                     | 27.30                       | 0.069                             |
| 07/09/2018      | VIRc     | 2              | -                | 1,699,123              | 1824                           | 1,538,040              | 2,236                                 | 497                                             | 12,015                        | 871                                     | 90.52                       | 0.809                             |
| 12/09/2018      | vir-1    | 2              | -                | 858,747                | 1094                           | 812,517                | 1,880                                 | 491                                             | 15,040                        | 846                                     | 94.62                       | 0.959                             |
| 25/09/2018      | VIRc     | 4              | -                | 1,435,808              | 2710                           | 1,318,857              | 1,947                                 | 493                                             | 10,836                        | 832                                     | 91.85                       | 1.600                             |
| 28/09/2018      | vir-1    | 3              | -                | 1,843,192              | 865                            | 1,746,153              | 1,134                                 | 480                                             | 15,291                        | 884                                     | 94.74                       | 0.878                             |
| 03/10/2018      | vir-1    | 4              | -                | 1,355,795              | 1436                           | 1,271,511              | 1,128                                 | 487                                             | 11,522                        | 802                                     | 93.78                       | 1.467                             |
| 19/10/2018      | VIRc     | 3              | -                | 1,678,723              | 1548                           | 1,570,040              | 2,127                                 | 500                                             | 11,471                        | 849                                     | 93.53                       | 0.887                             |

1260 **Supplementary table 1. Properties of the nanopore DRS sequencing data.**

1261 Dataset statistics for all nanopore DRS sequencing runs conducted. Datasets are sorted by the date  
1262 of the sequencing run. All data was collected using a MinION with R9.4 flow cell and SQK-RNA001  
1263 library kit. Increases in mapping and over-splitting rate that occur in samples collected after  
1264 September 2018 are therefore likely to have resulted from changes in the MinKNOW software.

1265 **[Linked to Figure 1 through 6].**

1266



1267 A

| Replicate 1                              | Adapter |         | No adapter |        | Signal-to-noise ratio |
|------------------------------------------|---------|---------|------------|--------|-----------------------|
|                                          | Fails   | Passes  | Fails      | Passes |                       |
| Match length > 10 nt                     | 58,078  | 211,786 | 47,548     | 11,427 | 15.17                 |
| Log <sub>10</sub> E value < 2            | 76,926  | 192,938 | 57,874     | 1,101  | 131.8                 |
| Adapter matches directly after alignment | 198,296 | 71,568  | 58,936     | 39     | 545.4                 |

1268

1269 B

| Replicate 2                              | Adapter |         | No adapter |        | Signal-to-noise ratio |
|------------------------------------------|---------|---------|------------|--------|-----------------------|
|                                          | Fails   | Passes  | Fails      | Passes |                       |
| Match length > 10 nt                     | 37,631  | 342,158 | 100,791    | 12,653 | 72.4                  |
| Log <sub>10</sub> E value < 2            | 60,605  | 319,184 | 112,781    | 663    | 895.9                 |
| Adapter matches directly after alignment | 266,812 | 112,977 | 113,429    | 15     | 3,202                 |

1270

1271 **Supplementary table 2. Adapter detection using BLASTN rules approach.**

1272 The number of reads with adapters were detected in two biological replicates (Tables A and B  
1273 respectively) of Col-0 sequenced with and without adapter ligation protocol. Rules are applied  
1274 cumulatively (i.e. row one shows reads that pass the first rule, row two shows reads that pass the  
1275 first and second rules, etc.). The signal-to-noise ratio shows the number of positive examples  
1276 detected using rules in the adapter-ligated dataset divided by the number of false positives from the  
1277 dataset collected without adapters.

1278 **[Linked to Figure 3].**

1279

1280 A

| ArTD2 | Arport11 | Illumina | Nanopore EC | Nanopore | Canonical | Non-canonical |
|-------|----------|----------|-------------|----------|-----------|---------------|
|       |          |          |             |          | 99,966    | 805           |
|       |          |          |             |          | 84,630    | 79,377        |
|       |          |          |             |          | 25,769    | 57,298        |
|       |          |          |             |          | 20,893    | 404           |
|       |          |          |             |          | 10,882    | 21,484        |
|       |          |          |             |          | 7,301     | 545           |
|       |          |          |             |          | 6,941     | 210           |
|       |          |          |             |          | 6,256     | 879           |
|       |          |          |             |          | 4,801     | 1,894         |
|       |          |          |             |          | 3,939     | 160           |
|       |          |          |             |          | 3,665     | 31            |
|       |          |          |             |          | 2,844     | 59            |
|       |          |          |             |          | 2,424     | 28            |
|       |          |          |             |          | 2,006     | 18            |
|       |          |          |             |          | 832       | 453           |
|       |          |          |             |          | 828       | 5             |
|       |          |          |             |          | 585       | 6             |
|       |          |          |             |          | 512       | 6             |
|       |          |          |             |          | 484       | 31            |
|       |          |          |             |          | 390       | 53            |
|       |          |          |             |          | 369       | 33            |
|       |          |          |             |          | 326       | 2             |

|  |  |  |  |  |     |   |
|--|--|--|--|--|-----|---|
|  |  |  |  |  | 193 | 6 |
|  |  |  |  |  | 148 | 8 |
|  |  |  |  |  | 76  | 3 |
|  |  |  |  |  | 47  | 4 |
|  |  |  |  |  | 24  | 0 |
|  |  |  |  |  | 21  | 0 |
|  |  |  |  |  | 20  | 0 |
|  |  |  |  |  | 18  | 0 |
|  |  |  |  |  | 1   | 0 |

1281

1282 **B**

| atRTD2 | Araport11 | DRS EC | Isoforms |
|--------|-----------|--------|----------|
|        |           |        | 29,894   |
|        |           |        | 27,585   |
|        |           |        | 11,967   |
|        |           |        | 8,659    |
|        |           |        | 3,788    |
|        |           |        | 756      |
|        |           |        | 341      |

1283

1284 **Supplementary table 3. Splice junctions supported by nanopore DRS and Illumina RNAseq.**

1285 Numbers are shown for (A) the unique splice junction set intersections upset plot (Figure 4B) and (B)

1286 unique linked splicing events upset plot (Figure 4C). Shaded cells denote sets included in the

1287 intersection for that row, while unshaded cells denote sets excluded from the intersection. Rows are

1288 sorted by the size of the intersection for canonical splice junctions.

1289 **[Linked to Figure 4].**

1290

1291

| AGI locus ID | Gene name | Pathway                                        | log2 fold change | Log2 counts per million | False discovery Rate | Differentially expressed (abs logFC > 1, FDR < 0.05) |
|--------------|-----------|------------------------------------------------|------------------|-------------------------|----------------------|------------------------------------------------------|
| AT2G19520    | FVE       | Autonomous                                     | -0.40            | 5.49                    | 3.95E-08             | -                                                    |
| AT2G21660    | ATGRP7    | Autonomous                                     | 0.03             | 6.11                    | 8.57E-01             | -                                                    |
| AT2G43410    | FPA       | Autonomous                                     | 0.70             | 5.03                    | 1.75E-11             | -                                                    |
| AT3G04610    | FLK       | Autonomous                                     | 0.29             | 5.18                    | 5.90E-04             | -                                                    |
| AT3G10390    | FLD       | Autonomous                                     | 0.31             | 3.80                    | 6.68E-03             | -                                                    |
| AT4G02560    | LD        | Autonomous                                     | 0.68             | 4.36                    | 7.49E-09             | -                                                    |
| AT4G16280    | FCA       | Autonomous                                     | 0.71             | 5.02                    | 2.90E-09             | -                                                    |
| AT5G13480    | FY        | Autonomous                                     | 0.49             | 3.80                    | 8.78E-04             | -                                                    |
| AT4G22950    | AGL19     | FLC-independent vernalization pathway          | 1.10             | 0.81                    | 9.17E-04             | +                                                    |
| AT2G45660    | SOC1      | Floral integrator                              | -1.64            | 6.72                    | 4.55E-84             | +                                                    |
| AT5G60910    | FUL       | Floral integrator and flower meristem identity | -1.13            | 2.09                    | 1.84E-09             | +                                                    |
| AT1G25560    | TEM1      | Floral repressor                               | -0.81            | 6.50                    | 3.83E-02             | -                                                    |
| AT1G68840    | TEM2      | Floral repressor                               | -0.19            | 7.08                    | 6.30E-01             | -                                                    |
| AT2G22540    | SVP       | Floral repressor                               | -0.29            | 6.96                    | 2.20E-03             | -                                                    |
| AT3G57390    | AGL18     | Floral repressor                               | 0.10             | 3.30                    | 5.36E-01             | -                                                    |
| AT5G13790    | AGL15     | Floral repressor                               | 0.52             | 1.02                    | 7.22E-02             | -                                                    |
| AT1G24260    | SEP3      | Flower development                             | 1.02             | 2.82                    | 9.91E-09             | +                                                    |
| AT1G02400    | GA2ox6    | Gibberellin                                    | 0.43             | 2.09                    | 3.69E-02             | -                                                    |
| AT1G14920    | GAI       | Gibberellin                                    | -0.27            | 6.22                    | 5.95E-03             | -                                                    |
| AT1G15550    | GA3ox1    | Gibberellin                                    | -0.68            | 1.36                    | 1.72E-02             | -                                                    |
| AT1G18075    | miR159b   | Gibberellin                                    | 0.72             | 0.13                    | 4.98E-02             | -                                                    |
| AT1G30040    | GA2ox2    | Gibberellin                                    | -0.08            | 1.86                    | 8.15E-01             | -                                                    |
| AT1G47990    | GA2ox4    | Gibberellin                                    | -0.12            | 0.76                    | 7.18E-01             | -                                                    |
| AT1G78440    | GA2ox1    | Gibberellin                                    | -1.43            | -0.19                   | 2.57E-04             | +                                                    |
| AT1G79460    | GA2       | Gibberellin                                    | -0.33            | 2.80                    | 4.69E-02             | -                                                    |
| AT2G01570    | RGA       | Gibberellin                                    | -0.09            | 7.22                    | 4.01E-01             | -                                                    |
| AT3G05120    | GID1A     | Gibberellin                                    | -0.33            | 4.93                    | 1.74E-03             | -                                                    |
| AT3G11440    | MYB65     | Gibberellin                                    | -0.37            | 1.99                    | 4.23E-02             | -                                                    |
| AT3G63010    | GID1B     | Gibberellin                                    | 0.76             | 3.51                    | 4.26E-12             | -                                                    |
| AT4G02780    | CPS1      | Gibberellin                                    | 0.68             | 0.33                    | 2.28E-02             | -                                                    |
| AT4G24210    | SLY1      | Gibberellin                                    | -0.39            | 4.02                    | 2.31E-03             | -                                                    |
| AT4G25420    | GA20ox1   | Gibberellin                                    | 0.18             | 1.48                    | 5.58E-01             | -                                                    |
| AT5G06100    | MYB33     | Gibberellin                                    | 0.17             | 3.76                    | 1.20E-01             | -                                                    |
| AT5G27320    | GID1C     | Gibberellin                                    | -0.06            | 4.74                    | 6.60E-01             | -                                                    |
| AT5G51810    | GA20ox2   | Gibberellin                                    | -1.75            | 1.94                    | 7.84E-14             | +                                                    |
| AT5G03840    | TFL1      | Inflorescence architecture                     | -1.68            | -0.43                   | 1.64E-05             | +                                                    |
| AT2G27990    | PNF       | Inflorescence meristem development             | 0.52             | 1.78                    | 1.60E-03             | -                                                    |
| AT5G02030    | PNY       | Inflorescence meristem development             | 0.08             | 4.08                    | 5.24E-01             | -                                                    |
| AT1G04400    | CRY2      | Light perception                               | -0.28            | 7.25                    | 4.69E-03             | -                                                    |
| AT1G09570    | PHYA      | Light perception                               | 0.01             | 7.56                    | 9.35E-01             | -                                                    |
| AT2G18790    | PHYB      | Light perception                               | 0.13             | 6.35                    | 2.45E-01             | -                                                    |
| AT1G25540    | PFT1      | Light perception                               | 0.28             | 4.49                    | 9.86E-03             | -                                                    |
| AT4G34530    | CIB1      | Light signalling                               | -0.99            | 4.14                    | 2.13E-04             | -                                                    |
| AT5G46210    | CUL4      | Light signalling                               | 0.14             | 6.54                    | 7.76E-02             | -                                                    |
| AT4G24540    | AGL24     | Meristem response                              | -1.14            | 2.49                    | 1.99E-08             | +                                                    |
| AT4G35900    | FD        | Meristem response                              | -0.31            | 1.78                    | 2.46E-01             | -                                                    |
| AT1G53090    | SPA4      | Photoperiod                                    | 0.17             | 4.96                    | 6.88E-02             | -                                                    |
| AT1G65480    | FT        | Photoperiod                                    | -1.75            | -0.32                   | 6.10E-08             | +                                                    |
| AT1G69570    | CDF5      | Photoperiod                                    | -0.34            | 4.05                    | 7.97E-02             | -                                                    |
| AT2G28550    | TOE1      | Photoperiod                                    | 0.94             | 6.42                    | 1.16E-24             | -                                                    |
| AT2G32950    | COP1      | Photoperiod                                    | 0.53             | 5.43                    | 5.84E-09             | -                                                    |
| AT2G34720    | NFYA4     | Photoperiod                                    | -0.31            | 5.45                    | 7.93E-03             | -                                                    |
| AT2G38880    | NFYB1     | Photoperiod                                    | -0.44            | 3.93                    | 8.79E-06             | -                                                    |
| AT2G39250    | SNZ       | Photoperiod                                    | 0.65             | 4.99                    | 2.46E-09             | -                                                    |
| AT2G46340    | SPA1      | Photoperiod                                    | 0.58             | 7.45                    | 4.89E-11             | -                                                    |
| AT2G47700    | RFI2      | Photoperiod                                    | -0.44            | 5.55                    | 3.52E-05             | -                                                    |
| AT3G15354    | SPA3      | Photoperiod                                    | 0.84             | 6.06                    | 1.01E-13             | -                                                    |
| AT3G47500    | CDF3      | Photoperiod                                    | 0.62             | 6.44                    | 8.79E-11             | -                                                    |
| AT3G48590    | NFYC1     | Photoperiod                                    | -0.67            | 4.61                    | 2.85E-09             | -                                                    |
| AT3G54990    | SMZ       | Photoperiod                                    | 0.54             | 2.37                    | 1.39E-02             | -                                                    |
| AT4G11110    | SPA2      | Photoperiod                                    | 0.28             | 5.26                    | 2.56E-03             | -                                                    |
| AT4G14540    | NFYB3     | Photoperiod                                    | 0.23             | 5.21                    | 1.93E-02             | -                                                    |
| AT5G12840    | NFYA1     | Photoperiod                                    | -0.30            | 5.15                    | 2.97E-04             | -                                                    |

|           |         |                                                   |       |       |          |   |
|-----------|---------|---------------------------------------------------|-------|-------|----------|---|
| AT5G39660 | CDF2    | Photoperiod                                       | -0.25 | 5.03  | 1.65E-01 | - |
| AT5G47640 | NFYB2   | Photoperiod                                       | -0.30 | 6.06  | 2.59E-03 | - |
| AT5G57660 | COL5    | Photoperiod                                       | -0.67 | 8.85  | 7.86E-07 | - |
| AT5G60120 | TOE2    | photoperiod                                       | 0.38  | 4.71  | 6.29E-05 | - |
| AT5G62430 | CDF1    | Photoperiod                                       | -0.01 | 5.50  | 9.25E-01 | - |
| AT3G22380 | TIC     | Photoperiod, circadian clock                      | 0.68  | 8.16  | 5.64E-15 | - |
| AT5G57360 | ZTL     | Photoperiod, circadian clock                      | 0.18  | 6.13  | 3.36E-02 | - |
| AT1G01060 | LHY     | Photoperiod, circadian clock                      | 0.32  | 6.54  | 1.85E-02 | - |
| AT1G09530 | PIF3    | Photoperiod, circadian clock                      | -0.31 | 4.76  | 4.49E-02 | - |
| AT1G12910 | LWD1    | Photoperiod, circadian clock                      | -0.29 | 4.94  | 3.13E-03 | - |
| AT1G22770 | GI      | Photoperiod, circadian clock                      | 0.93  | 5.13  | 3.98E-16 | - |
| AT2G18915 | LKP2    | Photoperiod, circadian clock                      | -0.38 | 4.47  | 2.23E-03 | - |
| AT2G21070 | FIO1    | Photoperiod, circadian clock                      | 0.31  | 2.93  | 1.67E-02 | - |
| AT2G25930 | ELF3    | Photoperiod, circadian clock                      | 0.99  | 4.41  | 1.04E-14 | - |
| AT2G40080 | ELF4    | Photoperiod, circadian clock                      | 1.01  | -0.36 | 2.20E-03 | + |
| AT2G46790 | PRR9    | Photoperiod, circadian clock                      | 1.55  | 5.39  | 3.77E-20 | + |
| AT2G46830 | CCA1    | Photoperiod, circadian clock                      | 0.04  | 7.64  | 7.18E-01 | - |
| AT3G04910 | WNK1    | Photoperiod, circadian clock                      | -0.41 | 7.16  | 2.29E-04 | - |
| AT3G26640 | LWD2    | Photoperiod, circadian clock                      | -0.57 | 3.75  | 1.89E-06 | - |
| AT3G46640 | LUX     | Photoperiod, circadian clock                      | 0.26  | 3.28  | 1.86E-01 | - |
| AT3G60250 | CKB3    | Photoperiod, circadian clock                      | -0.53 | 5.49  | 3.48E-06 | - |
| AT4G08920 | CRY1    | Photoperiod, circadian clock                      | -0.36 | 8.36  | 5.54E-05 | - |
| AT4G16250 | PHYD    | Photoperiod, circadian clock                      | 1.14  | 4.13  | 1.97E-19 | + |
| AT4G18130 | PHYE    | Photoperiod, circadian clock                      | 0.77  | 5.50  | 1.49E-14 | - |
| AT5G02810 | PRR7    | Photoperiod, circadian clock                      | 0.23  | 7.01  | 5.61E-03 | - |
| AT5G08330 | CHE     | Photoperiod, circadian clock                      | -0.86 | 6.21  | 8.99E-11 | - |
| AT5G24470 | PRR5    | Photoperiod, circadian clock                      | 0.31  | 2.67  | 2.29E-01 | - |
| AT5G35840 | PHYC    | Photoperiod, circadian clock                      | 0.46  | 5.53  | 2.50E-06 | - |
| AT5G37260 | CIR1    | Photoperiod, circadian clock                      | 0.25  | 3.12  | 1.60E-01 | - |
| AT5G59560 | SRR1    | Photoperiod, circadian clock                      | -0.28 | 3.43  | 4.74E-02 | - |
| AT5G60100 | PRR3    | Photoperiod, circadian clock                      | 1.69  | 0.92  | 5.93E-11 | + |
| AT5G61380 | PRR1    | Photoperiod, circadian clock                      | 0.12  | 3.91  | 3.92E-01 | - |
| AT5G64813 | LIP1    | Photoperiod, circadian clock                      | -0.33 | 4.75  | 5.34E-04 | - |
| AT1G68050 | FKF1    | Photoperiod, circadian clock                      | 0.68  | -0.32 | 3.91E-02 | - |
| AT5G17690 | TFL2    | Photoperiod, vernalization and flower development | 0.00  | 4.46  | 9.97E-01 | - |
| AT2G42200 | SPL9    | Vegetative and reproductive phase change          | 0.42  | 3.03  | 8.60E-03 | - |
| AT3G57920 | SPL15   | Vegetative and reproductive phase change          | 0.89  | 0.49  | 1.34E-02 | - |
| AT1G53160 | SPL4    | Vegetative to reproductive transition             | -1.75 | 2.89  | 1.38E-20 | + |
| AT2G25095 | miR156a | Vegetative to reproductive transition             | 0.49  | 0.32  | 9.78E-02 | - |
| AT2G33810 | SPL3    | Vegetative to reproductive transition             | -1.55 | 4.69  | 4.76E-20 | + |
| AT3G15270 | SPL5    | Vegetative to reproductive transition             | -1.94 | 1.48  | 9.23E-15 | + |
| AT4G31877 | miR156c | Vegetative to reproductive transition             | -0.67 | 0.51  | 2.22E-02 | - |
| AT1G17760 | Cstf77  | Vernalization                                     | 0.23  | 4.42  | 4.52E-02 | - |
| AT1G71800 | Cstf64  | Vernalization                                     | 0.52  | 3.29  | 4.32E-05 | - |
| AT3G18990 | VRN1    | Vernalization                                     | -0.12 | 4.78  | 1.54E-01 | - |
| AT4G00650 | FRI     | Vernalization                                     | 0.26  | 2.78  | 1.51E-01 | - |
| AT5G10140 | FLC     | Vernalization                                     | -6.06 | 1.29  | 2.44E-64 | + |
| AT1G61040 | VIP5    | -                                                 | 0.42  | 4.98  | 3.00E-08 | - |
| AT2G06210 | VIP6    | -                                                 | 0.09  | 5.54  | 3.63E-01 | - |
| AT2G31650 | ATX1    | -                                                 | 0.51  | 2.96  | 7.01E-03 | - |
| AT3G48430 | REF6    | -                                                 | 0.26  | 5.21  | 1.89E-02 | - |
| AT4G20400 | Jmj4    | -                                                 | 0.22  | 5.26  | 1.81E-02 | - |
| AT5G04240 | ELF6    | -                                                 | 0.34  | 4.96  | 4.65E-04 | - |
| AT1G08970 | NFYC3   | -                                                 | -0.64 | 5.32  | 1.57E-15 | - |
| AT1G14400 | UBC1    | -                                                 | -0.59 | 6.65  | 1.10E-10 | - |
| AT1G54830 | NFYC9   | -                                                 | -0.57 | 4.25  | 8.50E-08 | - |
| AT1G55250 | HUB2    | -                                                 | -0.12 | 4.83  | 2.25E-01 | - |
| AT1G56170 | NFYC2   | -                                                 | -0.29 | 3.59  | 2.10E-02 | - |
| AT1G76710 | SDG26   | -                                                 | -0.01 | 3.53  | 9.47E-01 | - |
| AT1G77080 | MAF1    | -                                                 | -0.31 | 5.01  | 2.71E-04 | - |
| AT1G77300 | EFS     | -                                                 | 0.87  | 5.69  | 2.31E-11 | - |
| AT1G79730 | ELF7    | -                                                 | 0.58  | 5.26  | 2.31E-11 | - |
| AT2G02760 | UBC2    | -                                                 | -0.35 | 6.12  | 2.08E-05 | - |
| AT2G23380 | CLF     | -                                                 | 0.18  | 4.07  | 2.68E-01 | - |
| AT2G33835 | FES     | -                                                 | 0.18  | 3.32  | 1.16E-01 | - |
| AT2G44950 | HUB1    | -                                                 | 0.11  | 4.92  | 2.45E-01 | - |
| AT2G45640 | SAP18   | -                                                 | -0.86 | 5.11  | 1.98E-15 | - |
| AT3G12810 | PIE1    | -                                                 | 0.93  | 5.33  | 1.07E-17 | - |
| AT3G24440 | VIL1    | -                                                 | 0.41  | 3.99  | 3.18E-04 | - |
| AT3G33520 | ESD1    | -                                                 | -0.16 | 4.09  | 1.60E-01 | - |

|           |       |   |       |      |          |   |
|-----------|-------|---|-------|------|----------|---|
| AT3G49600 | UBP26 | - | 0.41  | 4.92 | 2.39E-05 | - |
| AT4G15880 | ESD4  | - | 0.00  | 4.68 | 9.60E-01 | - |
| AT4G16845 | VRN2  | - | -0.03 | 4.17 | 7.95E-01 | - |
| AT4G29830 | VIP3  | - | -0.22 | 3.96 | 1.23E-02 | - |
| AT4G32980 | ATH1  | - | 0.94  | 4.91 | 2.84E-15 | - |
| AT4G39400 | BRI1  | - | 0.22  | 7.58 | 1.34E-01 | - |
| AT5G11530 | EMF1  | - | 0.43  | 4.70 | 4.55E-04 | - |
| AT5G16320 | FRL1  | - | 0.09  | 2.57 | 6.41E-01 | - |
| AT5G23150 | HUA2  | - | 1.38  | 5.55 | 2.97E-26 | + |
| AT5G37055 | SEF   | - | -0.44 | 2.64 | 2.11E-03 | - |
| AT5G51230 | EMF2  | - | 0.36  | 5.12 | 8.51E-06 | - |
| AT5G61150 | VIP4  | - | 0.07  | 5.73 | 4.71E-01 | - |
| AT5G65050 | MAF2  | - | -0.27 | 5.31 | 2.58E-03 | - |
| AT5G65060 | MAF3  | - | -0.64 | 3.89 | 9.91E-09 | - |
| AT5G65070 | MAF4  | - | -0.20 | 0.46 | 4.02E-01 | - |

1292

1293 **Supplementary table 4. Flowering time gene expression.**

1294 Change in gene expression of curated genes involved in flowering time in Arabidopsis, as detected  
 1295 using Illumina RNAseq for *vir-1* compared with the VIR-complemented line. In all, 12.2% of flowering  
 1296 time genes show a change in mRNA level expression in the *vir-1* mutant. Source of flowering time  
 1297 genes: George Coupland, Cologne: [https://www.mpipz.mpg.de/14637/Arabidopsis\\_flowering\\_genes](https://www.mpipz.mpg.de/14637/Arabidopsis_flowering_genes)  
 1298 **[Linked to Figure 6].**

1299

1300

| Primer name | Primer sequence                               | Experiment                    | Gene or gene coordinates |
|-------------|-----------------------------------------------|-------------------------------|--------------------------|
| At1g29550 F | ATGGTGGTTACGGATTCTCCA                         | Chimeric RNA                  | AT1G29550-               |
| At1g29560 R | TTAAACTCCATCTCCCTCTTT                         | detection RT-PCR              | AT1G29560                |
| F_spl2_A    | GCTGTGTTCCTTTTCTCAGCA                         | Splicing events               | AT2G27385                |
| R_spl2_A    | CTGCCTTGGAGTTCTGCTTC                          | validation RT-PCR             |                          |
| F_spl5_A    | AGGGATAAGCTCTTCTTTTTCC                        | Splicing events               | 3:12559692–              |
| R_spl5_A    | CGACGGTGACAACGAACC                            | validation RT-PCR             | 12559814                 |
| F_spl7_AB   | GTGGTGTGAGCCGGAGT                             | Splicing events               | AT3G42806                |
| R_spl7_B    | CTTCTCGGTGGCTTTTCTC                           | validation RT-PCR             |                          |
| F_spl8_B    | ATATGGACGATACTTTATACCCTTTG                    | Splicing events               | AT3G62040                |
| R_spl8_B    | AGCCATGGTGGTTCCATATT                          | validation RT-PCR             |                          |
| F_spl9_AB   | AATATTTCCGGTGAATAGCC                          | Splicing events               | AT3G26395                |
| R_spl9_B    | AAGCCCAGAATCCGGTGA                            | validation RT-PCR             |                          |
| CCA1_For    | GATGATGTTGAGGCGGATG                           | RT-qPCR (clock phenotype)     | AT2G46830                |
| CCA1_Rev    | TGGTGTTAACTGAGCTGTGAAG                        |                               |                          |
| UBC_For     | CTGCGACTCAGGGAATCTTCTAA                       | RT-qPCR (clock phenotype)     | AT5G25760                |
| UBC_Rev     | TTGTGCCATTGAATTGAACCC                         |                               |                          |
| F_GFP_CDS_T | GCGGCCGC TAATACGACTCACTATAGGGAGA              | PCR                           | mGFP                     |
| 7prom_NotI  | ATGAGTAAAGGAGAAGAAGCTTTTCACTG                 |                               |                          |
| R_GFP_CDS_  | GGCGCGCC                                      |                               |                          |
| Ascl        | TTATTTGTATAGTTCATCCATGCCATG                   |                               |                          |
| FLC-Fwd     | GAGCCAAGAAGACCGAACTC                          | RT-qPCR (flowering phenotype) | AT5G10140                |
| FLC-Rev     | TTCTGCTCCACATGATGA                            |                               |                          |
| RT41clip    | NNGTATNNNAGATCGGAAGAGCGTCGTGgatc<br>CTGAACCGC | miCLIP library preparation    | –                        |
| RT48clip    | NNTGTGNNNAGATCGGAAGAGCGTCGTGgatc<br>CTGAACCGC |                               |                          |
| RT49clip    | NNTTCTNNNAGATCGGAAGAGCGTCGTGgatc<br>CTGAACCGC |                               |                          |
| RT50clip    | NNTTTCNNNAGATCGGAAGAGCGTCGTGgatc<br>CTGAACCGC |                               |                          |

1301

1302 **Supplementary table 5. Primers used in this study.**

1303

1304 **List of Figure Supplements**

1305  
1306

1307 Supplementary figure 1. Properties of nanopore DRS sequencing data.[Linked to Figure 1].

1308 Supplementary figure 2. 3' end processing is revealed by nanopore DRS. [Linked to Figure 2].

1309 Supplementary figure 3. Nanopore DRS with cap-dependent ligation of 5' adapter RNA. [Linked to  
1310 Figure 3].

1311 Supplementary figure 4. Patterns of splicing revealed using nanopore DRS. [Linked to Figure 4].

1312 Supplementary figure 5. Identification of VIR-dependent m<sup>6</sup>A transcriptome-wide. [Linked to Figure  
1313 5].

1314 Supplementary figure 6. Changes in the gene expression of circadian clock components and in RNA  
1315 3' end formation in the *vir-1* mutant. [Linked to Figure 6].

1316 Supplementary table 1. Properties of the nanopore DRS sequencing data.[Linked to Figures 1  
1317 through 6].

1318 Supplementary table 2. Adapter detection using BLASTN rules approach. [Linked to Figure 3].

1319 Supplementary table 3. Splice junctions supported by nanopore DRS and Illumina RNAseq.[Linked to  
1320 Figure 4].

1321 Supplementary table 4. Flowering time gene expression. [Linked to Figure 6].

1322 Supplementary table 5. Primers used in this study.

1323

1324

1325
